# Supplementary material for: Changing pattern of ice flow and mass balance for glaciers discharging into the Larsen A and B embayments, Antarctic Peninsula, 2011 to 2016
Source: Copernicus journal article supplement (doi:10.5194/tc-2017-259), 2017-11-28
Supplement: Supplementary file [file tc-2017-259-AC2-supplement.pdf]

1 **Changing pattern of ice flow and mass balance for glaciers discharging into the Larsen A and**  
2 **B embayments, Antarctic Peninsula, 2011 to 2016**

3

4 Helmut Rott<sup>1,2\*</sup>, Wael Abdel Jaber<sup>3</sup>, Jan Wuite<sup>1</sup>, Stefan Scheiblauer<sup>1</sup>, Dana Floricioiu<sup>3</sup>, Jan  
5 Melchior van Wessem<sup>4</sup>, Thomas Nagler<sup>1</sup>, Nuno Miranda<sup>5</sup>, Michiel R. van den Broeke<sup>4</sup>

6

7 [1] ENVEO IT GmbH, Innsbruck, Austria

8 [2] Institute of Atmospheric and Cryospheric Sciences, University of Innsbruck, Innsbruck, Austria

9 [3] Institute for Remote Sensing Technology, German Aerospace Center, Oberpfaffenhofen,  
10 Germany

11 [4] Institute for Marine and Atmospheric Research, Utrecht University, Utrecht, the Netherlands

12 [5] European Space Agency/ESRIN, Frascati, Italy

13 \*Correspondence to: [Helmut.Rott@enveo.at](mailto:Helmut.Rott@enveo.at)

14

15

16 **Abstract**

17

18 We analyzed volume change and mass balance of outlet glaciers on the northern Antarctic Peninsula  
19 over the periods 2011 to 2013 and 2013 to 2016, using high resolution topographic data of the  
20 bistatic interferometric radar satellite mission TanDEM-X. Complementary to the geodetic method  
21 applying DEM differencing, we computed the net mass balance of the main outlet glaciers by the  
22 ~~input/output~~mass budget method, accounting for the difference between the surface mass balance  
23 (SMB) and the discharge of ice into an ocean or ice shelf. The SMB values are based on output of  
24 the regional climate model RACMO Version 2.3p2. For studying glacier flow and retrieving ice  
25 discharge we generated time series of ice velocity from data of different satellite radar sensor, with  
26 radar images of the satellites TerraSAR-X and TanDEM-X as main source. The study area  
27 comprises tributaries to the Larsen-A, Larsen Inlet, and Prince-Gustav-Channel embayments  
28 (region A), the glaciers calving into Larsen B embayment (region B), and the glaciers draining into  
29 the remnant part of Larsen B ice shelf in SCAR Inlet (region C). The glaciers of region A, where the  
30 buttressing ice shelf disintegrated in 1995, and of region B (ice shelf break-up in 2002) show  
31 continuing losses in ice mass, with significant reduction of losses after 2013. The mass balance  
32 numbers for the grounded glacier area of the region A are  $B_n = -3.98 \pm 0.33 \text{ Gt a}^{-1}$  during 2011 to  
33 2013 and  $B_n = -2.38 \pm 0.18 \text{ Gt a}^{-1}$  during 2013 to 2016. The corresponding numbers for region B are  
34  $B_n = -5.75 \pm 0.45 \text{ Gt a}^{-1}$  and  $B_n = -2.32 \pm 0.25 \text{ Gt a}^{-1}$ . The mass ~~losses~~balance in region C during the  
35 two periods ~~were was modest~~slightly negative,  $B_n = -0.54 \pm 0.38 \text{ Gt a}^{-1}$ , respectively  $B_n = -0.58 \pm$   
36  $0.25 \text{ Gt a}^{-1}$ . The main share in the overall mass losses of the region ~~were was~~ contributed by two  
37 glaciers: Drygalski Glacier contributing 61 % to the mass deficit of region A, and Hektor and  
38 Green glaciers accounting for 67 % to the mass deficit of region B. Hektor and Green glaciers  
39 accelerated significantly in 2010/2011, triggering elevation losses up to  $19.5 \text{ m a}^{-1}$  on the lower  
40 terminus ~~and a rate of mass depletion of  $3.88 \text{ Gt a}^{-1}$~~ -during the period 2011 to 2013, resulting in a  
41 mass balance of  $-3.88 \text{ Gt a}^{-1}$ . Slowdown of calving velocities and reduced calving fluxes in 2013 to  
42 2016 coincided with years when the ice mélange and sea ice cover ~~in front of the glaciers~~  
43 in proglacial fjords and bays during summer.

44

45

## 46 1. Introduction

47 The disintegration of the ice shelves in Prince-Gustav-Channel and the Larsen A embayment in  
48 January 1995 (Rott et al., 1996) and the break-up of the northern and central sections of Larsen B  
49 embayment in March 2002 (Rack and Rott, 2004; Glasser and Scambos, 2008) triggered near-  
50 immediate acceleration of the outlet glaciers previously feeding the ice shelves, resulting in major  
51 mass losses due to increased ice discharge (Rott et al., 2002; De Angelis and Skvarca, 2003;  
52 Scambos et al., 2004; Scambos et al., 2011). Precise, spatially detailed data on flow dynamics and  
53 mass balance of these glaciers since ice-shelf disintegration are essential for understanding the  
54 complex glacier response to the loss of ice shelf buttressing, as well as to learn about processes  
55 controlling the adaptation to new boundary conditions. Furthermore, due to the complex topography  
56 of this region, spatially detailed data on glacier surface elevation change and mass balance are the  
57 key for reducing the uncertainty of northern Antarctic Peninsula (API) contributions to sea level  
58 rise.

59 Several studies dealt with mass balance, acceleration and thinning of glaciers after disintegration of  
60 the Larsen A and B ice shelves, with the majority focusing on glaciers of the Larsen B embayment.  
61 A complete, detailed analysis of changes in ice mass was performed by Scambos et al. (2014) for 33  
62 glacier basins covering the API mainland and adjoining islands north of 66°S, using a combination  
63 of digital elevation model (DEM) differencing from optical stereo satellite images and repeat-track  
64 laser altimetry from the Ice, Cloud, and Land Elevation Satellite (ICESat). The DEM difference  
65 pairs cover the periods 2001-2006, 2003-2008, and 2004-2010 for different sections of the study  
66 area, and are integrated with ICESat data of the years 2003 to 2008. A detailed analysis of surface  
67 elevation change and mass depletion for API outlet glaciers draining into the Larsen-A, Larsen  
68 Inlet, and Prince-Gustav-Channel (PGC) embayments during 2011 to 2013 was reported by Rott et  
69 al. (2014), based on topographic data of the TanDEM-X/TerraSAR-X satellite formation. With an  
70 ~~annual loss in ice-a~~ mass balance of  $-4.21 \pm 0.37 \text{ Gt a}^{-1}$  during 2011-2013 these glaciers were still  
71 largely out of balance, although the loss rate during this period was diminished by 27% compared to  
72 the loss rate reported by Scambos et al. (2014) for 2001 to 2008. Studies on frontal retreat, ice  
73 velocities, and ice discharge, based on remote sensing data of the period 1992 to 2014, are reported  
74 by Seehaus et al. (2015) for the Dinsmoor–Bombardier–Edgeworth glacier system previously  
75 feeding the Larsen A ice shelf and by Seehaus et al. (2016) for glaciers of Sjøgren Inlet previously  
76 feeding the PGC ice shelf.

77 As observed previously for Larsen A (Rott et al., 2002), the major outlet glaciers to the Larsen B  
78 embayment started to accelerate and ~~get thinner~~thin immediately after the collapse of the ice shelf  
79 (Rignot et al., 2004; Scambos et al., 2004; De Rydt et al., 2015). The patterns of acceleration,

80 thinning and change of frontal position have been variable in time and space. After strong  
81 acceleration during the first years, some of the main glaciers slowed down significantly after 2007,  
82 resulting in major decrease of calving fluxes. Other glaciers continued to show widespread  
83 fluctuations in velocity, with periods of major frontal retreat alternating with stationary positions or  
84 intermittent frontal advance (Wuite et al., 2015). The remnant section of Larsen B ice shelf in  
85 SCAR inlet started to accelerate soon after the central and northern sections of the ice shelf broke  
86 away, triggering modest acceleration of the main glaciers flowing into the SCAR inlet ice shelf  
87 (Wuite et al., 2015; Khazendar et al., 2015).

88 Several publications reported on ice export and mass balance of Larsen-B glaciers. Shuman et al.  
89 (2011) derived surface elevation change from optical stereo satellite imagery and laser altimetry of  
90 ICESat and the airborne Airborne Topographic Mapper (ATM) of NASA's IceBridge program. For  
91 the period 2001 to 2006 they report a combined ~~rate of mass losses~~mass balance of  $-8.4 \pm 1.7 \text{ Gt a}^{-1}$   
92 for the glaciers discharging into Larsen B embayment and SCAR Inlet, excluding ice lost by frontal  
93 retreat. ICESat and ATM altimetry measurements spanning 2002–2009 show for lower Crane  
94 Glacier a period of very rapid drawdown between September 2004 and September 2005, bounded  
95 by periods of more moderate rates of surface lowering (Scambos et al., 2011). Rott et al. (2011)  
96 derived velocities and ice discharge of the nine main Larsen B glaciers in pre-collapse state (1995  
97 and 1999) and for 2008-2009, estimating the mass ~~imbalance~~ of these glaciers in 2008 at  $-4.34 \pm$   
98  $1.64 \text{ Gt a}^{-1}$ . Berthier et al. (2012) report a mass ~~loss rate~~balance of  $-9.04 \pm 2.01 \text{ Gt a}^{-1}$  for Larsen B  
99 glaciers, excluding SCAR inlet, for the period 2006 to 2010/2011, based on altimetry and optical  
100 stereo imagery. Scambos et al. (2014) analysed changes in ice mass from ICESat data spanning  
101 September 2003 to March 2008 and stereo image DEMs spanning 2001/2002 to 2006. They report a  
102 combined ~~rate of mass losses~~balance of  $-7.9 \text{ Gt a}^{-1}$  for the tributaries of the Larsen B embayment  
103 and ~~of~~ $-1.4 \text{ Gt a}^{-1}$  for the tributaries to SCAR Inlet ice shelf. Wuite et al. (2015) report for main  
104 outlet glaciers strongly reduced calving fluxes during the period 2010 to 2013 compared to the first  
105 few years after ice shelf collapse.

106 We use high resolution data of surface topography derived from synthetic aperture radar  
107 interferometry (InSAR) satellite measurements for retrieving changes in glacier volume and  
108 estimating glacier mass balance over well-defined epochs for API outlet glaciers along the Weddell  
109 Coast between PGC and Jason Peninsula. In addition, we generate ice velocity maps to study the  
110 temporal evolution of ice motion and derive the ice discharge for the major glacier drainage basins.  
111 We compute the mass balance also by means of the ~~input-output~~mass budget method ~~(IOM)~~,  
112 quantifying the difference between glacier surface mass balance (SMB) and the discharge of ice  
113 into the ocean or across the grounding line to an ice shelf. The SMB estimates are obtained from

114 output of the regional atmospheric climate model RACMO Version 2.3p2 at grid size of ~ 5.5 km  
115 (van Wessem et al., 2016; 2017).

116 Volume change and mass balance of glaciers discharging into the PGC, Larsen Inlet and Larsen A  
117 embayments were derived by Rott et al. (2014) for the period 2011 to 2013, applying TanDEM-X  
118 DEM differencing. Here we extend the observation period for the same glacier basins by covering  
119 the time span 2013 to 2016. Furthermore, we present time series of surface velocity starting in  
120 1993/1995 in order to relate the recent flow behavior to pre-collapse conditions.

121 For glaciers of the Larsen-B embayment we generated maps of surface elevation change by  
122 TanDEM-X DEM differencing for the periods 2011 to 2013 and 2013 to 2016. From these maps we  
123 derived mass changes at the scale of individual glacier drainage basins. In addition, we obtained  
124 mass balance estimates for the eight main glaciers by the ~~input/output~~ mass budget method and  
125 compare the results of the two independent methods. A detailed analysis of surface velocities of  
126 Larsen B glaciers for the period 1995 to 2013 was presented by Wuite et al. (2015). We extend the  
127 time series to cover glacier velocities up to 2016.

128 These data sets disclose large temporal and spatial variability in ice flow and surface elevation  
129 change between different glacier basins and show ongoing loss of grounded ice. This provides a  
130 valuable basis for studying factors responsible for instability and downwasting of glaciers and for  
131 exploring possible mechanisms of adaptation to new boundary conditions.

## 132 **2. Data and methods**

### 133 **2.1 DEM differencing using TanDEM-X interferometric SAR data**

134 The study is based on remote sensing data from various satellite missions. We applied DEM  
135 differencing using interferometric SAR data (InSAR) of the TanDEM-X mission to map the surface  
136 elevation change and retrieve the mass balance for 24 catchments on the API east coast between  
137 PGC and Jason Peninsula (Supplement, Table S1). Large glaciers are retained as single catchments  
138 whereas smaller glaciers and glaciers that used to share the same outlet are grouped together. For  
139 separation of glacier drainage basins inland of the frontal areas the glacier outlines of the  
140 Glaciology Group, University of Swansea, are used which are available at the GLIMS data base  
141 (Cook et al., 2014). We updated the glacier fronts for several dates of the study period using  
142 TerraSAR-X, TanDEM-X and Landsat-8 images. Catchment outlines and frontal positions in 2011,  
143 2013 and 2016 are plotted in a Landsat image of 2016-10-29 (Supplement, Figures S1 and S2).

144 The TanDEM-X mission (TDM) employs a bi-static interferometric configuration of the two  
145 satellites TerraSAR-X and TanDEM-X flying in close formation (Krieger et al., 2013). The two  
146 satellites form together a single-pass synthetic aperture radar (SAR) interferometer, enabling the

147 acquisition of highly accurate cross-track interferograms that are not affected by temporal  
148 decorrelation and variations in atmospheric phase delay. The main objective of the mission is the  
149 acquisition of a global DEM with high accuracy. The 90 % relative point-to-point height accuracy  
150 for moderate terrain is  $\pm 2$  m at 12 m posting (Rossi et al., 2012; Rizzoli et al., 2012). Higher relative  
151 vertical accuracy can be achieved for measuring elevation change over time.

152 Our analysis of elevation change is based on DEMs derived from interferograms acquired by the  
153 TanDEM-X mission in mid-2011, -2013 and -2016. SAR data takes from descending satellite orbits,  
154 acquired in 2013 and 2016, cover the API east coast glaciers between  $64^\circ$  S and the Jason  
155 Peninsula, as well as parts of the west coast glaciers (Supplement, Figure S3). For 2011 we  
156 processed data takes covering the Larsen B glaciers. Over the Larsen A glaciers TDM data from  
157 2011 and 2013 had been processed in an earlier study to derive surface elevation change (SEC). The  
158 mid-beam incidence angle of the various tracks varies between 36.1 and 45.6 degrees. The height of  
159 ambiguity (HoA, the elevation difference corresponding to a phase cycle of  $2\pi$ ) varies between 20.6  
160 m and 68.9 m, providing good sensitivity to elevation (Rott, 2009) (Supplement, Table S2). Only  
161 track A has larger HoA and thus less height sensitivity; this track extends along the west coast and  
162 covers only a very small section of study glaciers along the Weddell Coast.

163 We used the operational Integrated TanDEM-X Processor (ITP) of the German Aerospace Center  
164 (DLR) to process the raw bistatic SAR data of the individual tracks into so-called Raw DEMs  
165 (Rossi et al., 2012; Abdel Jaber et al., 2016). In the production line for the global DEM, which also  
166 uses the ITP Processor, Raw DEMs are intermediate products before DEM mosaicking. An option  
167 recently added to the ITP foresees the use of reference DEMs to support Raw DEM processing  
168 (Lachaise and Fritz, 2016). We applied this option for generating the Raw DEMs, subtracting the  
169 phase of the simulated reference DEM from the interferometric phase of the corresponding scene.  
170 The recently released TanDEM-X global DEM with a posting of 0.4 arcsec was used as the main  
171 ~~source for the~~ reference DEM. Although the relative elevation in output is not related to the  
172 reference DEM, the presence of inconsistencies in the reference DEM may lead to artefacts in the  
173 output DEM. Therefore some preparatory editing was performed: unreliable values were removed  
174 based on the provided consistency mask of the global DEM and visual analysis and were substituted  
175 ~~by data of~~ from the Antarctic Peninsula DEM of Cook et al. (2012). The phase difference image,  
176 which has a much lower fringe frequency, is unwrapped and summed up with the simulated phase  
177 image. This option provides a robust phase unwrapping performance for compiling the individual  
178 DEMs. By subtracting the two DEMs and accounting for the appropriate time span we obtain a  
179 surface elevation rate of change map, with horizontal posting at about 12 m x 12 m.

180 For estimating the uncertainty of the TanDEM SEC maps we use a fully independent data set

181 acquired during NASA IceBridge campaigns that became available after the production of the TDM  
182 SEC maps had been completed [\(Supplement, Section 3\)](#). Surface elevation rate of change data  
183 (dh/dt, product code IDHDT4) derived from Airborne Topographic Mapper (ATM) swathes,  
184 acquired on 2011-11-14 and 2016-11-10, cover longitudinal profiles on six of our study glaciers  
185 (Studinger, 2014, updated 2017). Each IDHDT4 data record corresponds to an area where two ATM  
186 lidar swathes have co-located measurements. The IDHDT4 data are provided as discrete points  
187 representing 250 m x 250 m surface area and are posted at about 80 m along-track spacing. We  
188 compare mean values of cells comprising 7 x 7 TDM dh/dt pixels (12 m x 12 m pixel size) with the  
189 corresponding IDHDT4 points. Even though the start and end dates of the TDM and ATM data sets  
190 differ by a few months, the agreement in dh/dt is very good. The root mean square differences  
191 (RMSD) of the data points range from 0.14 m a<sup>-1</sup> to 0.35 m a<sup>-1</sup> for the different glaciers, and the  
192 mean difference of the ATM – TDM data sets is dh/dt = -0.08 m a<sup>-1</sup> [\(Supplement, Table S3\)](#). For the  
193 error analysis we assume that the differences result from uncertainties in both data sets. The  
194 resulting RMSE for the TDM dh/dt cells is 0.20 m a<sup>-1</sup> over the five year time span, and 0.39 m a<sup>-1</sup>  
195 and 0.58 m a<sup>-1</sup> for the three and two year time span, respectively.

196 [In order to demonstrate the concordance of the dh/dt data sets, we show in Figure 1 a scatterplot of](#)  
197 [ATM and TDM dh/dt values from the central flowline on Crane Glacier. The TDM dh/dt data are](#)  
198 [derived from DEMs of 2011-06-30 and 2016-08-07. Because of the time shifts between ATM and](#)  
199 [TDM data acquisitions we start with the comparison 5 km inland of the front in order to avoid the](#)  
200 [impact of the shifting glacier front, of floating section of the terminus and of moving crevasse](#)  
201 [zones. The data in the figure include the points as far as the upper end of the ATM profile at 1000 m](#)  
202 [elevation. In spite of the time shift the agreement between the two data sets is excellent; the](#)  
203 [coefficient of determination \(R<sup>2</sup>\) is 0.98.](#)

204 The agreement between the lidar and radar dh/dt data indicates that radar penetration is not an issue  
205 for deriving elevation change from the SAR based DEMs of this study. This can be attributed to the  
206 close agreement of the view angles in the corresponding SAR repeat data, acquired from the same  
207 orbit track and beam, and to the consistency of radar propagation properties in the snow and firn  
208 bodies. The latter point follows from the similarity of the backscatter coefficients of the  
209 corresponding scenes, with differences between the two dates staying below 1 dB. The radar  
210 backscatter coefficient can be used as indicator on stability ~~in~~[of](#) the structure and radar propagation  
211 properties of a snow/ice medium which determine the signal penetration and the offset of the  
212 scattering phase centre versus the surface (Rizzoli et al., 2017). The ~~TSX and~~TDM SAR  
213 backscatter images have high radiometric accuracy (absolute radiometric accuracy 0.7 dB, relative  
214 radiometric accuracy 0.3 dB), well suitable for quantifying temporal changes in backscatter



215 (Schwerdt et al., 2010; Walter Antony et al., 2016).

216 The main outlet glaciers of the study area arise from the plateaus along the central API ice divide.  
217 The plateaus stretch across elevations between about 1500 and 2000 m a.s.l. A steep escarpment,  
218 dropping about 500 m in elevation, separates the plateau from the individual glacier streams and  
219 cirques. The high resolution SEC maps, shown in Figures 42, 56, and 67, cover the areas below the  
220 escarpment excluding parts of the steep rock- and ice- covered slopes along the glacier streams.  
221 These gaps are due to the particular SAR observation geometry, with slopes facing towards the  
222 illuminating radar beam appearing compressed (foreshortening) or being affected by superposition  
223 of dual or multiple radar signals (layover) (Rott, 2009). On areas with gentle topography and on  
224 slopes facing away from the radar beam (back-slopes) the surface elevation and its change can be  
225 derived from the interferometric SAR images. In order to fill the gaps in areas of foreshortening and  
226 layover, we checked topographic change on back-slopes. The TDM data set includes SEC data for  
227 38 individual sections on back-slopes with mean slope angles  $\geq 20$  degrees, covering a total area of  
228  $787 \text{ km}^2$ . The mean  $dh/dt$  value of these slopes is  $-0.054 \text{ m a}^{-1}$ . The satellite derived velocity maps  
229 show surface velocities  $< 0.02 \text{ m d}^{-1}$  ~~anywhere~~ on ~~the~~ any slope areas, indicating that dynamic  
230 effects are insignificant for mass turnover. This explains the observed stability of surface  
231 topography.

232 There are some gaps in the SEC maps also on the plateau above the escarpment. The TDM SEC  
233 analysis covers substantial parts (all together  $2013 \text{ km}^2$ ) of the ice plateaus between 1500 m and  
234 2000 m, the mean value  $dh/dt$  is  $-0.012 \text{ m a}^{-1}$ . No distinct spatial pattern is evident. Considering the  
235 small change of surface elevation in the available data samples of the ice plateau and on the slopes,  
236 we assume stationary conditions for the unsurveyed slopes and the central ice plateau. For  
237 estimation of uncertainty we assume for these areas a bulk uncertainty  $dh/dt = \pm 0.10 \text{ m a}^{-1}$  for the  
238 error budget of elevation change derived from DEMs spanning three years and  $dh/dt = \pm 0.15 \text{ m a}^{-1}$   
239 for DEMs spanning two years ([Supplement, Section 3](#)).

## 240 2.2 Ice velocity maps and calving fluxes

241 We generated maps of glacier surface velocity for several dates of the study period from radar  
242 satellite images, extending the available velocity time series up to 2016. The main data base for the  
243 recent velocity maps are repeat-pass SAR images of the satellites TerraSAR-X and TanDEM-X.  
244 Gaps in these maps, primarily in the slowly moving interior, are filled with velocities derived from  
245 SAR images of Sentinel-1 (S1) and of the Phased Array L-band SAR (PALSAR) on ALOS. We  
246 applied offset tracking for deriving two-dimensional surface displacements in radar geometry and  
247 projected these onto the glaciers surfaces defined by the ASTER-based Antarctic Peninsula digital



248 elevation model (API-DEM) of Cook et al. (2012). The velocity data set comprises the three  
249 components of the surface velocity vector in Antarctic polar stereographic projection resampled to a  
250 50 m grid.

251 The TerraSAR-X/TanDEM-X velocity maps are based on SAR strip map mode images of 11-day  
252 repeat-pass orbits, using data spanning one or two repeat cycles. Due to the high spatial resolution  
253 of the images (3.3 m along the flight track and 1.2 m in radar line-of-sight) velocity gradients are  
254 well resolved. [Wuite et al. \(2015\) estimate the uncertainty of velocity maps \(magnitude\) of Larsen](#)  
255 [B glaciers derived from TerraSAR-X 11-day repeat pass images at  \$\pm 0.05\$  m d<sup>-1</sup>.](#)

256 Regarding S1 we use single look complex (SLC) Level 1 products acquired in Interferometric Wide  
257 (IW) swath mode, with nominal spatial resolution 20 m x 5 m (Torres et al. 2012; Nagler et al.,  
258 2015). Images of the Sentinel-1A satellite at 12-day repeat cycle cover the study region since  
259 December 2014. Since September 2016 the area is also covered by the Sentinel-1B satellite,  
260 providing a combined S1 data set with 6-day repeat coverage. ~~Wuite et al. (2015) estimate the~~  
261 ~~uncertainty of velocity magnitude derived from TerraSAR X 11-day repeat pass images at  $\pm 0.05$  m~~  
262 ~~d<sup>-1</sup>.~~—In order to check the impact of combining different ice velocity products, we compared  
263 TerraSAR-X/TanDEM-X velocity maps of the study area, resampled to 200 m, with S1 velocity  
264 maps using data sets with a maximum time difference of 10 days. The overall mean bias (S1 –  
265 TerraSAR-X/TanDEM-X) between the two data sets (sample 570,000 points) is 0.011 m d<sup>-1</sup> for  
266 velocity component Ve (easting) and -0.002 m d<sup>-1</sup> for Vn (northing), the RMSD is 0.175 m d<sup>-1</sup> for  
267 Ve and 0.207 m d<sup>-1</sup> for Vn. [The RMSD values for the TerraSAR-X and Sentinel-1 velocity product](#)  
268 [are mainly due to the different spatial resolution of the sensors.](#) The good agreement of the mean  
269 velocity values points out that velocity data from the two missions can be well merged.

270 In addition to the recently generated velocity products we use velocity data from earlier years for  
271 [supporting](#) the scientific interpretation which were derived from SAR data of various satellite  
272 missions, including ERS-1, ERS-2, Envisat ASAR, and ALOS PALSAR (Rott et al., 2002; 2011;  
273 2014; Wuite et al., 2015).

274 In order to obtain mass balance estimates by the [input/output mass budget](#) method, we compute the  
275 mass flux F across a gate of width Y [m] at the calving front or grounding line according to:

$$F_Y = \rho_i \int_0^Y [u_m(y)H(y)] dy$$

276  $\rho_i$  is the density of ice,  $u_m$  is the mean velocity of the vertical ice column perpendicular to the gate,  
277 and H is the ice thickness. We use ice density of 900 kg m<sup>-3</sup> to convert ice volume into mass. For  
278 calving glaciers full sliding is assumed across calving fronts, so that  $u_m$  corresponds to the surface

279 velocity,  $u_s$ , obtained from satellite data. For glaciers discharging into the SCAR Inlet ice shelf we  
280 estimated the ice deformation at the flux gates applying the laminar flow approximation (Paterson,  
281 1994). The resulting vertically averaged velocity for these glaciers is  $u_m = 0.95 u_s$ . The ice thickness  
282 at the flux gates is obtained from various sources. For some glaciers sounding data on ice thickness  
283 are available, measured either by in situ or airborne radar sounders (Farinotti et al., 2013; 2014;  
284 Leuschen et al. 2010, updated 2016). For glaciers with floating terminus the ice thickness is  
285 deduced from the height above sea level applying the flotation criterion.

286 The uncertainty estimate for mass balance at basin scale, derived by means of the mass budget  
287 method, accounts for uncertainties of surface mass balance (SMB) and for uncertainties in flow  
288 velocity and ice thickness at the flux gates (Supplement, Section 3). For uncertainty estimates of  
289 mass fluxes we assume  $\pm 10\%$  error for the cross section area of glaciers with GPR data across or  
290 close to the gates and  $\pm 15\%$  for glaciers where the ice thickness is deduced from frontal height  
291 above flotation. The velocities used for computing calving fluxes are exclusively derived from  
292 TerraSAR-X and TanDEM-X repeat pass data. For velocities across the gates we assume  $\pm 5\%$   
293 uncertainty. For the uncertainty of surface mass balance at basin scale, based on RACMO output,  
294 we assume  $\pm 15\%$  uncertainty.

### 295 **3. Elevation change and mass balance of glaciers north of Seal Nunataks**

#### 296 **3.1 Elevation change and mass balance by DEM differencing**

297 The map of surface elevation change  $dh/dt$  from June/July 2013 to July/August 2016 for the glacier  
298 basins discharging into PGC, Larsen Inlet and Larsen A embayment is shown in Figure 42. The  
299 numbers on elevation change, volume change and mass balance, excluding floating glacier areas,  
300 are specified in Table 1. As explained in Section 2.1, for areas not displayed in this map (steep radar  
301 fore-slopes and the ice plateau above the escarpment) the available data indicate minimal changes in  
302 surface elevation so that stable surface topography is assumed for estimating the net mass balance.

303 For glaciers with major sections of floating ice and frontal advance or retreat the extent, SEC and  
304 volume change (including the subaqueous part) of the floating area and the advance/retreat area and  
305 volume are specified in Table 2. The area extent of floating ice is inferred from the reduced rate of  
306 SEC compared to grounded ice, using the height above sea level as additional constraint. Dinsmoor-  
307 Bombardier-Edgeworth glaciers (DBE, basin A4) had the largest floating area ( $56.2 \text{ km}^2$ ) extending  
308 about 8 km into a narrow fjord and showed also the largest frontal advance ( $11.7 \text{ km}^2$ ) between  
309 2013 and 2016.

310 The mass depletion of grounded ice in the basins A1 to A7 ( $B_n = -2.38 \text{ Gt a}^{-1}$ ) during the period  
311 2013 to 2016 amounts to 60 % of the 2011 to 2013 ~~depletion rate~~value ( $B_n = -3.98 \text{ Gt a}^{-1}$  for the

312 grounded areas; Rott et al., 2014). The mass deficit is dominated by Drygalski Glacier ( $B_n = -1.72$   
313  $\text{Gt a}^{-1}$  for 2013 to 2016 and ~~), down from~~  $-2.18 \text{ Gt a}^{-1}$  for 2011 to 2013). A decline of mass losses  
314 between the first and second period is observed for all basins except A3 (Albone, Pyke, Polaris,  
315 Eliason glaciers, APPE) in Larsen Inlet which was approximately in balanced state during 2011 to  
316 2016 (Table 1, Figure 2).

317 The altitude dependence of elevation change ( $dh/dt$ ) for the three basins with the largest mass  
318 deficit is shown in Figure 23. Positive values in the lowest elevation zone of Basin A2 and A6 are  
319 due to frontal advance. The areas close to the fronts include partly floating ice so that the observed  
320 SEC is smaller than on grounded areas further upstream. The largest loss rates are observed in  
321 elevation zones several km inland of the front.

### 322 3.2 Flow velocities, calving fluxes and mass balance by the input/output mass budget method

323 Data on flow velocities provide on one hand input for deriving calving fluxes, on the other hand  
324 information for studying the dynamic response of the glaciers. Figure 3-4 shows maps of surface  
325 velocities in 2011 and 2016, derived from TerraSAR-X and TanDEM-X 11-day repeat pass images,  
326 and a map of the difference in velocity between October/November 1995 and 2016. Insets show the  
327 velocity difference 2011 to 2016 for the main glaciers that were subject to slowdown. The 1995  
328 velocity map was derived from interferometric one-day repeat pass data of crossing orbits from the  
329 satellites ERS-1 and ERS-2 (map shown in Figure S3 of Rott et al., 2014, Supplementary Material).  
330 In October/November 1995, ten months after ice shelf collapse, the velocities at calving fronts had  
331 already accelerated significantly compared to pre-collapse conditions (Rott et al., 2002). Between  
332 2011 and 2016 the flow velocities slowed down significantly. Even so, in 2016 the terminus  
333 velocities of the major outlet glaciers still exceeded the November 1995 velocities.

334 Details on velocities along central flowlines of Drygalski, Edgeworth and Sjögren glaciers and the  
335 position of calving fronts are shown in Figure 4-5 for different dates between 1993/1995 and 2016.  
336 The distance along the x-axis refers to the 1995 grounding line retrieved from ERS-1/ERS-2 InSAR  
337 data (Rott et al., 2002). The front of the three glaciers retreated since 1995 by several kilometres,  
338 with the largest retreat (11 km) by Sjögren Glacier in 2012. Between 2013 and 2016 the front of  
339 Edgeworth Glacier advanced by 1.5 km and the front of Sjögren Glacier by 0.5 km.

340 The velocity of Sjögren Glacier ~~shows a gradual decrease of velocity~~ decreased gradually from 2.9  
341  $\text{m d}^{-1}$  in August 2009 to 1.5  $\text{m d}^{-1}$  in October 2016, referring to the centre of the 2009 front. The  
342 calving velocity on Edgeworth Glacier in the centre of the flux gate decreased from 2.5  $\text{m d}^{-1}$  in  
343 October 2008 to 1.1  $\text{m d}^{-1}$  in August 2016. The rate of deceleration between 2013 and 2016 was  
344 particularly pronounced on the lowest 6 km of the terminus where the ice was ungrounded. For

345 Drygalski Glacier we show also pre-collapse velocities (January 1993), derived from 35-day ERS-1  
346 repeat pass images by offset tracking. In November 1995 the glacier front was located near the pre-  
347 collapse grounding line, but the flow acceleration had already propagated 10 km upstream of the  
348 front. Due to rapid flow the phase of the 31 October/1 November 1995 ERS-1/ERS-2 InSAR pair is  
349 decorrelated on the lowest two kilometres, prohibiting there interferometric velocity retrieval.  
350 Velocities of January 1999 and November 2015 are similar,  $7.0 \text{ m d}^{-1}$  at the location of the 2015  
351 glacier front. Velocities were lower in 2007 to 2009, and higher in 2011 to 2014, reaching  $8.8 \text{ m d}^{-1}$   
352 in November 2011.

353 The recent period of abating flow velocities coincides with years when the sea ice cover persisted  
354 during summer. Time series of satellite SAR images show open water in front of the glaciers during  
355 several summers up to summer 2008/09 and again in the summers 2010/2011 and 2011/2012. Ice  
356 mélange and S sea ice persisted all year round from winter 2012 onwards. Open leads in summer  
357 and the gradual drift of ice that calved off from the glaciers indicate ~~occasional~~ moderate movement  
358 of sea ice.

359 Slowdown of calving velocities is the main cause for reduced mass deficits during the period 2013  
360 to 2016 compared to previous years. Numbers on calving fluxes for 2011 to 2013 and 2013 to 2016  
361 and the mass balance, derived by the IOM mass budget method (MBM), are specified for four main  
362 glacier basins in Table 3. For deriving the calving flux (CF) for each period a linear interpolation  
363 between the fluxes at the start date and end date of the period is applied, including a correction for  
364 the time lag between ice motion and topography data. If velocity data are available on additional  
365 dates in between, these are also taken into account for temporal interpolation. Whereas the SMB  
366 values between the periods 2011 to 2013 and 2013 to 2016 differs only by 2%, the combined annual  
367 calving flux of the four glaciers is reduced by 16 % during 2013 to 2016 (Table 3). The decrease is  
368 even more pronounced when calving fluxes on-of individual dates in 2011, 2013 and 2016 are  
369 compared. On Drygalski Glacier the calving flux decreased from  $4.03 \text{ Gt a}^{-1}$  in November 2011 to  
370  $3.34 \text{ Gt a}^{-1}$  in December 2013 and  $2.92 \text{ Gt a}^{-1}$  in September 2016, a decrease by 28 % during the  
371 five years.

372 The differences in the mass balance by TDM SEC (Table 1) and IOM-MBM (Table3) are within the  
373 specified uncertainty. For IOM-MBM the mass balance of the four glaciers sums up to  $B_n = -3.26 \text{ Gt}$   
374  $\text{a}^{-1}$  for 2011 to 2013 and  $B_n = -2.23 \text{ Gt a}^{-1}$  for 2013 to 2016. The corresponding numbers from SEC  
375 analysis, after adding or subtracting the subaqueous mass changes, are  $B_n = -3.01 \text{ Gt a}^{-1}$  and  $B_n = -$   
376  $1.99 \text{ Gt a}^{-1}$  for the two periods.

377 For Drygalski Glacier the mass balance numbers for the two periods are  $B_n = -2.29 \text{ Gt a}^{-1}$  and  $B_n = -$   
378  $1.80 \text{ Gt a}^{-1}$  by IOMMBM, and-versus  $B_n = -2.18 \text{ Gt a}^{-1}$  and  $B_n = -1.80 \text{ Gt a}^{-1}$  (including the

379 | subaqueous part) by TDM SEC analysis. The good agreement of the ~~IOM-MBM~~ and SEC mass  
380 | balance values for Drygalski Glacier backs up the RACMO estimate for SMB with specific net  
381 | balance  $b_n = 1383 \text{ kg m}^{-2}\text{a}^{-1}$ . For the period 1980 to 2016 the mean SMB for Drygalski Glacier by  
382 | RACMO is  $1.35 \text{ Gt a}^{-1}$  ( ~~$b_n = 1342 \text{ kg m}^{-2}\text{a}^{-1}$~~ ). This is more than twice the ice mass flux across the  
383 | grounding line in pre-collapse state ( $0.58 \text{ Gt a}^{-1}$ ) obtained as model output by Royston and  
384 | Gudmundsson (2016) which would imply a highly positive mass balance taking RACMO SMB as  
385 | reference for mass input. Velocity measurements in October/November 1994 at stakes on Larsen A  
386 | Ice Shelf downstream of Drygalski Glacier show values that are close to the average velocity of the  
387 | 10-year period 1984 to 1994 (Rott et al., 1998; Rack et al., 1999). This supports the assumption that  
388 | the Larsen A tributary glaciers were approximately in balanced state before ice shelf collapse.

#### 389 | **4. Elevation change and mass balance of Larsen B glaciers**

##### 390 | **4.1 Elevation change and mass balance by DEM differencing**

391 | The map of surface elevation change  $dh/dt$  for the glacier basins discharging into the Larsen B  
392 | embayment and SCAR Inlet ice shelf is shown in Figure ~~5-6~~ for the period May/June 2011 to  
393 | June/July 2013 and in Figure ~~6-7~~ for June/July 2013 to July/August 2016. The numbers on elevation  
394 | change, volume change and mass balance, referring to grounded ice, are specified in Table 4 for  
395 | 2011 to 2013 and in Table 5 for 2013 to 2016.

396 | The SEC analysis shows large spatial and temporal differences in mass depletion between  
397 | individual glaciers. The overall mass deficit of the Larsen B region is dominated by glaciers  
398 | draining into the embayment where the ice shelf broke away in 2003 (basins B1 to B11). The annual  
399 | mass ~~deficit-balance~~ of the glaciers draining into SCAR Inlet ice shelf (basins B12 to B17)  
400 | ~~remained modest and was similar~~ was slightly negative in both periods:  $B_n = -0.54 \text{ Gt a}^{-1}$  during  
401 | 2011 to 2013 and  $B_n = -0.58 \text{ Gt a}^{-1}$  during 2013 to 2016. The small glaciers (B12 to B15) were in  
402 | balanced state (Table 4, Figures 6 and 7). The mass ~~balanced~~ deficit of Flask and Leppard glaciers  
403 | ~~was slightly negative due to~~ can be attributed to flow acceleration and increased ice export after  
404 | break-up of the main section of Larsen B Ice Shelf (Wuite et al., 2015).

405 | In 2011 to 2013 the total annual net mass balance of basins B1 to B11 amounted to  ~~$B_n = -5.75 \text{ Gt a}^{-1}$~~   
406 | <sup>1</sup>, with the mass deficit dominated by Hektoria-Green (HG) glaciers ( $B_n = -3.88 \text{ Gt a}^{-1}$ ), followed by  
407 | Crane Glacier ( $B_n = -0.72 \text{ Gt a}^{-1}$ ). The mass losses of Evans and Jorum glaciers and of basin B1  
408 | (northeast of Hektoria Glacier) were also substantial, whereas the mass deficit of the other glaciers  
409 | was modest. During the period 2013 to 2016 the annual mass deficit of the glacier ensemble was cut  
410 | by more than half ( $B_n = -2.32 \text{ Gt a}^{-1}$ ) compared to 2011 to 2013, with again HG dominating the  
411 | ~~mass~~ loss ( $B_n = -1.54 \text{ Gt a}^{-1}$ ). The decrease in mass depletion was also significant for other glaciers.

412 For Crane Glacier the 2013 to 2016 ~~loss-rate~~losses ( $B_n = -0.22 \text{ Gt a}^{-1}$ ) corresponds to only 18 % of  
413 the estimated balance flux (Rott et al., 2011), a large ~~drop~~change since 2007 with  $B_n = -3.87 \text{ Gt a}^{-1}$   
414 (Wuite et al., 2015).

415 The decline of mass depletion coincided with a period of permanent ~~sea-ice~~cover by ice mélange  
416 and sea ice in the pro-glacial fjords and bays, starting in autumn/winter 2011. During several  
417 summers before, including summer 2010/11, the sea ice in front of the glaciers drifted away and  
418 gave way to ~~extended periods~~several weeks with open water. During the years thereafter the  
419 continuous sea ice over obstructed the detachment of frontal ice and facilitated frontal advance. The  
420 maximum terminus advance was observed for HG glaciers, resulting in an increase of glacier area  
421 of  $31.6 \text{ km}^2$  from 2011 to 2013 and  $48.0 \text{ km}^2$  from 2013 to 2016 (Table 6).

422 Due to significant decrease in ice thickness the floating area on Hektoria and Green glaciers  
423 increased significantly after 2011, covering in June 2013 an area of  $19.8 \text{ km}^2$  inland of the 2011 ice  
424 front and in June 2016 an area of  $62.1 \text{ km}^2$  inland of the 2013 ice front, in addition to the frontal  
425 advance areas: ~~2011 to 2013, respectively 2013 to 2016~~, where the ice was almost completely  
426 ungrounded. Areas of floating ice, covering some  $\text{km}^2$  in area, were observed on Evans Glacier and  
427 Crane Glacier, increasing significantly between 2013 and 2016. The areas of frontal advance  
428 showed a similar temporal trend, with an increase of  $3.7 \text{ km}^2$  between 2011 and 2013 and  $5.4 \text{ km}^2$   
429 between 2013 and 2016 for Evans Glacier, and  $5.0 \text{ km}^2$  and  $10.5 \text{ km}^2$  for Crane Glacier.

430 Figure ~~7-8~~ shows the altitude dependence of elevation change ( $dh/dt$ ) for four basins with large  
431 mass deficits. The largest drawdown rate ( $19.5 \text{ m a}^{-1}$ ) was observed on HG glaciers in the elevation  
432 zone 200 m to 300 m a.s.l. during 2011 to 2013, with substantial drawdown up to the 1000 m  
433 elevation zone. On Jorum Glacier the area affected by surface lowering extended up to 700 m  
434 elevation, with a maximum rate of  $5 \text{ m a}^{-1}$ . The drawdown pattern of Crane Glacier is different, with  
435 the zone of the largest 2011 to 2013 drawdown rates ( $4.5 \text{ m a}^{-1}$ ) commencing about 30 km inland of  
436 the front, extending across the elevation range 500 m to 850 m, abating and shifting further  
437 upstream in 2013 to 2016. Scambos et al. (2011) observed an anomalous drawdown pattern on the  
438 Crane terminus during the first few years after ice shelf collapse, very likely associated with  
439 drainage of a subglacial lake.

#### 440 **4.2 Flow velocities, calving fluxes and mass balance by the ~~input/output~~mass budget method**

441 Figure ~~8-9~~ shows maps of surface velocities in 2011 and 2016 and a map of the differences in  
442 velocity between October/November 1995 and 2016. Insets show differences in velocity between  
443 2011 and 2016 for HG and Crane glaciers. Gaps in the 2011 TerraSAR-X/TanDEM-X velocity map  
444 are filled up with PALSAR data and in the 2016 map with Sentinel-1 data. The 1995 velocity map



445 used as reference for pre-collapse conditions, was derived from ERS one-day interferometric repeat  
446 pass data. The ERS data show very little difference between 1995 and 1999 flow velocities,  
447 suggesting that the glaciers were close to balanced state during those years (Rott et al, 2011). In  
448 2016 the velocities of the main glaciers were still higher than in 1995, but had slowed down  
449 significantly since 2011.

450 The temporal evolution of Larsen B glaciers between 1995 and 2013 is described in detail by Wuite  
451 et al. (2015), showing velocity maps for 1995 and 2008-2012 and time series of velocities along  
452 central flowlines of eight glaciers between 1995 and 2013. In extension, we report here velocity  
453 changes since 2013 and provide details on velocities of HG and Crane glaciers in recent years,  
454 including a diagram of velocities across the flux gates on different dates (Figure 910).

455 ~~The glaciers Flask and Leppard glaciers,~~ discharging into SCAR Inlet ice shelf, and the small  
456 glaciers of the main Larsen B embayment (B4, B5, B8 to B11) showed only small variations in  
457 velocity since 2011, though in 2016 the velocities of these glaciers were still higher than during the  
458 pre-collapse period. The main glaciers were subject to significant slowdown. On Crane Glacier the  
459 velocity in the centre of the flux gate decreased from a value of 6.8 m d<sup>-1</sup> in July 2007 to 3.9 m d<sup>-1</sup>  
460 in September 2011, 2.9 m d<sup>-1</sup> in November 2013 and 2.4 m d<sup>-1</sup> in October 2016, still 50 % higher  
461 than the velocities in 1995 and 1999. Because of major glacier thinning, the cross section of the flux  
462 gate decreased significantly, so that the calving flux amounted in mid-2016 to 1.39 Gt a<sup>-1</sup>, only  
463 20 % larger than in 1995 to 1999. Since 2007 the drawdown rate of Crane Glacier decreased  
464 steadily, from a mass balance ~~B<sub>n</sub> = of~~ -3.87 Gt a<sup>-1</sup> in June 2007 to ~~B<sub>n</sub> =~~ -0.23 Gt a<sup>-1</sup> in November  
465 2016. Also on Jorum Glacier the calving velocity decreased gradually since 2007; during 2013 to  
466 2016 the glacier was close to balanced state. On the other hand the velocity at the flux gate of  
467 Melville Glacier was in 2011 to 2016 only 5 % lower than in 2008, 2.6 times higher than the pre-  
468 collapse velocity reported by Rott et al. (2011). This agrees with the negative mass balance by TDM  
469 SEC analysis. However, the mass deficit is small in absolute terms because of the modest mass  
470 turnover.

471 The velocities of Hektor and Green glaciers have been subject to significant variations since 2002,  
472 associated with major frontal retreat but also intermittent periods of frontal advance (Wuite et al.,  
473 2015). Between November 2008 and November 2009 the velocity in the centre of the Hektor flux  
474 gate increased from 1.4 m d<sup>-1</sup> to 2.8 m d<sup>-1</sup>, slowed down slightly during 2010, and accelerated again  
475 in 2011 to reach a value of 4.2 m d<sup>-1</sup> in November 2011, followed by deceleration to 3.5 m d<sup>-1</sup> in  
476 March 2012, 2.0 m d<sup>-1</sup> in July 2013 and 1.4 m d<sup>-1</sup> in June 2016 (Figure 910). Similar deceleration  
477 was observed for Green Glacier, from 4.6 m d<sup>-1</sup> in November 2011, to 2.8 m d<sup>-1</sup> in July 2013 and  
478 2.0 m d<sup>-1</sup> in June 2016.



479 The slowdown and frontal advance of Larsen B calving glaciers coincided with a period of  
480 continuous ~~sea-ice~~ cover by ice mélange and sea ice in the proglacial fjords since mid-2011,  
481 indicating significant impact of pre-frontal marine conditions on ice flow (Supplement; Figure S4).  
482 ~~We tracked~~ ~~of~~ detached ice blocks close to glacier fronts to estimate the order of magnitude of  
483 motion. Typical values shows for for 2013 to 2016 ~~the following pre-frontal~~ displacements are: 6.1  
484 km for Crane Glacier, 2.7 km for Melville Glacier, 2.5 km for Jorum Glacier and 0.9 km for Mapple  
485 Glacier. This corresponds to about twice the flux gate velocity for Crane Glacier and about five  
486 times for Melville Glacier. The 2013 to 2016 displacement of ice blocks in front of HG glaciers (4.5  
487 km for Green, 3.9 km for Hektor) exceeded only slightly the distance of frontal advance.

488 The comparisons of mass balance by IOM-MBM (Table 7) and SEC shows good overall agreement,  
489 as well as for most of the individual basins. The combined 2011 to 2013 annual mass balance of the  
490 five basins discharging into the main Larsen B embayment (B2, B3, B6, B7, B10) is  $B_n = -5.26 \text{ Gt a}^{-1}$   
491  $\text{a}^{-1}$  by TDM SEC and  $B_n = -5.63 \text{ Gt a}^{-1}$  by IOMMBM, and for 2013 to 2016  $B_n = -2.15 \text{ Gt a}^{-1}$  by  
492 TDM SEC and  $B_n = -2.28 \text{ Gt a}^{-1}$  by IOMMBM. The SEC mass balance in this comparison includes  
493 also the volume change of the floating glacier sections (Table 6). Also for Starbuck and Flask  
494 glaciers (B13, B16) the mass balance values of the two methods agree well. The only basin where  
495 the difference between the two methods exceeds the estimated uncertainty is Leppard Glacier  
496 (B17), where IOM-MBM ( $B_n = -0.89 \text{ Gt a}^{-1}$  and  $B_n = -0.82 \text{ Gt a}^{-1}$  for the two periods) shows larger  
497 higher losses than SEC ( $B_n = -0.21 \text{ Gt a}^{-1}$  and  $B_n = -0.30 \text{ Gt a}^{-1}$ ). The SEC retrievals of the basins B3,  
498 B7, B10, B13, B16, which show good agreement between SEC and IOM-MBM mass balance, are  
499 based on data of the same TDM track as B17. Therefore it can be concluded that the difference in  
500 MB of Leppard Glacier is probably due to a bias either in SMB or in the cross section of the flux  
501 gate, or in both. The specific surface mass balance (Table 7) for the adjoining Flask Glacier is 39 %  
502 higher than for Leppard Glacier.

## 503 **5. Discussion**

504 The main outlet glaciers to the northern sections of Larsen Ice Shelf that disintegrated in 1995  
505 (Prince-Gustav-Channel and Larsen A ice shelves, PGC-LA) and in 2002 (the main section of  
506 Larsen B Ice Shelf) are still losing mass due to dynamic thinning. The losses are caused by  
507 accelerated ice flow tracing back to the reduction of backstress after ice shelf break-up triggering  
508 dynamic instabilities (Rott et al., 2002; 2011; Scambos et al., 2004; Wuite et al., 2015; De Rydt et  
509 al., 2015; Royston and Gudmundsson, 2016).

510 On the outlet glaciers to PGC-LA (basins A1 to A7) the rate of mass depletion of grounded ice  
511 decreased by 40 % from the period 2011 to 2013 ~~from~~ ( $B_n = -3.98 \pm 0.33 \text{ Gt a}^{-1}$ ) during to the

512 period 2013~~4~~ to 2016~~3~~ to ~~( $B_n = -2.38 \pm 0.18 \text{ Gt a}^{-1}$ ) during 2013 to 2016~~. The mass deficit of the  
513 area was dominated by losses of Drygalski Glacier, with an annual mass balance  ~~$B_n =$~~ of  $-2.18 \text{ Gt a}^{-1}$   
514 in 2011 to 2013 and  ~~$B_n =$~~  $-1.72 \text{ Gt a}^{-1}$  in 2013 to 2016. Scambos et al. (2014) report for 2001 to  
515 2008 a mass change-balance of  $-5.67 \text{ Gt a}^{-1}$  for glacier basins 21 to 25, corresponding approximately  
516 to our basins A1 to A7. On Drygalski Glacier the 2003 to 2008 ~~rate-ofannual~~ mass ~~depletion~~  
517 balance ( ~~$B_n =$~~  $-2.39 \text{ Gt a}^{-1}$ ) by Scambos et al. (2014) was only 9 % ~~higher-lower~~ than our estimate  
518 for 2011 to 2013. On the other glaciers of PGC and Larsen A embayment the slow-down of calving  
519 velocities and decrease in calving fluxes during the last decade was more pronounced.

520 On the outlet glaciers to Larsen B embayment (basins B1 to B11) the rate of mass depletion for  
521 grounded ice decreased by 60 % ~~(from  $B_n = 5.75 \pm 0.45 \text{ Gt a}^{-1}$  during 2011 to 2013, to  $B_n = -2.32 \pm$~~   
522  $0.25 \text{ Gt a}^{-1}$  during 2013 to 2016. Hektoria and Green glaciers accounted in both periods for the bulk  
523 of the mass deficit ( $B_n = -3.88 \text{ Gt a}^{-1}$ ,  $B_n = -1.54 \text{ Gt a}^{-1}$ ). High drawdown rates were observed on  
524 HG glaciers during 2011 to 2013, with the maximum value ( $19.5 \text{ m a}^{-1}$ ) in the elevation zone 200 m  
525 to 300 m a.s.l. Our basins B1 to B11 correspond to the basins 26a and 27 to 31a of Scambos et al.  
526 (2014). Based on ICESat data spanning September 2003 to March 2008 and optical stereo image  
527 DEMs acquired between November 2001 to November 2006, Scambos et al. (2014) report for these  
528 basins an annual mass balance  ~~$B_n =$~~ of  $-8.39 \text{ Gt a}^{-1}$  excluding ice lost by frontal retreat. Our rate of  
529 mass loss for 2011 to 2013 amounts to 69% of this value, and for 2013 to 2016 to 36%, a similar  
530 percentage decrease of mass losses as for the PGC-LA basins. After ice shelf break-up in March  
531 2002 glacier flow accelerated rapidly, causing large increase of calving fluxes during the first years  
532 after Larsen B collapse, whereas on most glaciers the calving velocities slowed down significantly  
533 after 2007 (Scambos et al., 2004, 2011; Rott et al., 2011; Shuman et al., 2011; Wuite et al., 2015).  
534 An exception is basin B2 (HG glaciers) for which the 2011 to 2013 loss rate was 2% higher than the  
535 value ( $B_n = -3.82 \text{ Gt a}^{-1}$ ) reported by Scambos et al. (2014) for 2001 to 2008.

536 The drawdown pattern on the main glaciers shows high elevation loss rates for grounded ice shortly  
537 upstream of the glacier front or upstream of the floating glacier section, and abating loss rates  
538 towards higher elevation. This is the typical loss pattern for changes in the stress state at the  
539 downstream end of a glacier as response to the loss of terminal floating ice (Hulbe et al., 2008). The  
540 elevation change pattern of recent years is different on Crane Glacier, where elevation decline and  
541 thinning migrated up-glacier during 2011 to 2016, an indication for upstream-propagating  
542 disturbances (Pfeffer, 2007). Both patterns indicate that the glaciers are still away from equilibrium  
543 state and-so that dynamic thinning will continue for years.

544 We compiled surface motion and calving fluxes for main glaciers of the study region and derived  
545 the surface mass balance from output of the regional atmospheric climate model RACMO. These

546 data enable to compare individual components of the mass balance. Whereas the SMB ~~differed~~  
547 between the periods 2011 to 2013 and 2013 to 2016 ~~differed~~ only by few per cent, the calving  
548 fluxes decreased significantly due to slow-down of ice motion, confirming that the mass losses were  
549 of dynamic origin, an aftermath to changes in the stress regime after ice shelf collapse.

550 The terminus velocities on most glaciers are still higher than during the pre-collapse period. After  
551 rapid flow acceleration during the first years after ice shelf break-up there has been a general trend  
552 of deceleration afterwards, however with distinct differences in the temporal pattern between  
553 individual glaciers. Glaciers with broad calving fronts show larger temporal variability of velocities  
554 and calving fluxes than glaciers with small width to length ratio. In the Larsen A embayment the  
555 Drygalski Glacier has been subject to major variations in flow velocity and calving flux during the  
556 last decade. In 2007 to 2009 the velocity in the centre of the flux gate varied between  $5.5 \text{ m d}^{-1}$  and  
557  $6 \text{ m d}^{-1}$ , increased to  $8 \text{ m d}^{-1}$  in 2011 and 2012, and decreased to  $6.0 \text{ m d}^{-1}$  in July 2016, still four  
558 times higher than the velocity in 1993. In the Larsen B embayment Hektor and Green glaciers  
559 showed large temporal fluctuation in velocity and a general trend of frontal retreat, but also sporadic  
560 periods of frontal advance. A major intermittent acceleration event, starting in 2010, was  
561 responsible for a large mass deficit in 2011 to 2013.

562 Regarding the SCAR Inlet ice shelf tributaries, the small glaciers (basin B12 to B15) were  
563 approximately in balanced state, whereas Flask (B16) and Leppard (B17) glaciers ~~had shown~~  
564 a moderate mass deficit. The total mass balance of the SCAR Inlet glaciers, based on TDM SEC  
565 analysis, was  $B_n = -0.54 \pm 0.38 \text{ Gt a}^{-1}$  in 2011 to 2013 and  $B_n = -0.58 \pm 0.38 \text{ Gt a}^{-1}$  in 2013 to 2016.  
566 As for the calving glaciers to the Larsen A and B embayments, the ~~loss rate was lower~~ mass balance  
567 was less negative than during the period 2001 to 2008 ( $B_n = -1.37 \text{ Gt a}^{-1}$ ) reported by Scambos et al.  
568 (2014).

569 The slowdown of flow velocities and decline in mass depletion between 2011 and 2016 coincided  
570 with periods of continuous ~~sea ice coverage by ice mélange (a mixture of icebergs and bergy bits,~~  
571 held together by sea ice), and sea ice in the pro-glacial fjords and bays. After several summers with  
572 open water (excluding summer 2009/10 ~~when sea ice persisted~~), a period of permanent coverage by  
573 ice mélange and sea ice ~~cover in front of the glaciers~~ commenced in Larsen B embayment in winter  
574 2011 and in PGC and Larsen A embayment in winter 2013. Observations and modelling of seasonal  
575 advance and retreat of calving fronts of Greenland outlet glaciers indicate that the buttressing  
576 pressure from rigid ice mélange is principally responsible for the seasonal variations (Walter et al.,  
577 2012; Todd and Christofferson, 2014; Amundson et al., 2016). Whereas for Greenland outlet  
578 glaciers ice mélange usually breaks up in spring, coinciding with ice flow acceleration and  
579 increased calving, the observations in the Larsen A and B embayments show persisting ice mélange

580 and sea ice cover over multiyear periods. The cold water of the surface mixed layer in the western  
581 Weddell Sea favours sea ice formation and the persistence of sea ice during summer.

582 The sea ice cover impeded glacier calving, as apparent in frontal advance of several glaciers. Large  
583 frontal advance was observed for HG glaciers (~3.2 km during 2011 to 2013 and ~3.8 km during  
584 2013 to 2016) and Crane Glacier (~1.2 km during 2011 to 2013 and ~2.5 km during 2013 to 2016).  
585 The front of Bombardier-Edgeworth glaciers advanced between 2013 and 2016 by 1.5 km and the  
586 front of Sjøgren Glacier by 0.5 km. The continuous sea ice cover and restricted movement of ice  
587 calving off from glaciers contrasts with the rapid movement of icebergs during the first few days  
588 after Larsen A and B collapse, drifting away by up to 20 km per day due to strong downslope winds  
589 and local ocean currents (Rott et al., 1996; Rack and Rott 2004). For 2006 to 2015 a modest trend of  
590 atmospheric cooling was observed in the study region, in particular in summer (Turner et al., 2016;  
591 Oliva et al., 2017). However, this feature does not fully explain the striking difference in sea ice  
592 pattern and ice drift. Changes in regional atmospheric circulation patterns affecting the frequency  
593 and intensity of downslope foehn events play a main role for the presence of sea ice and the  
594 variability of melt patterns (Cape et al., 2015). Clem et al. (2016) show that the interannual  
595 variability of northeast Peninsula temperatures is primarily sensitive to zonal wind anomalies and  
596 resultant leeside adiabatic warming. After 1999 changes in cyclonic conditions in the northern  
597 Weddell Sea resulted in higher frequency of east-to-southeasterly winds, increasing the advection of  
598 sea ice towards the east coast of the Antarctic Peninsula (Turner et al., 2016). Superimposed to these  
599 regional patterns in atmospheric circulation are local differences in the relationship between melting  
600 and foehn winds causing a comparatively high degree of spatial variability in the melt pattern  
601 (Leeson et al., 2012). The break-up patterns of sea ice in summer 2017 show as well local  
602 differences. Sjøgren fjord and the main section of Larsen A embayment got clear of sea ice whereas  
603 ice mélangé and sea ice persisted in Larsen Inlet, the inlet in front of DBE glaciers and in the Larsen  
604 B embayment.

## 605 **6. Conclusions**

606 The analysis of surface elevation change by DEM differencing over the periods 2011 to 2013 and  
607 2013 to 2016 shows continuing drawdown and major losses in ice mass for outlet glaciers to Prince-  
608 Gustav-Channel and the Larsen A and B embayments. During the observation period 2011 to 2016  
609 there was a general trend of decreasing mass depletion, induced by slowdown of calving velocities  
610 resulting in reduced calving fluxes. For several glaciers frontal advance was observed in spite of  
611 ongoing elevation losses upstream. The mass balance numbers for the glaciers north of Seal  
612 Nunataks are  $B_n = -3.98 \pm 0.33 \text{ Gt a}^{-1}$  during 2011 to 2013 and  $B_n = -2.38 \pm 0.18 \text{ Gt a}^{-1}$  during 2013  
613 to 2016. The corresponding numbers for glaciers calving into the Larsen B embayment for the two

614 | periods are  $B_n = -5.75 \pm 0.45 \text{ Gt a}^{-1}$  and  $B_n = -2.32 \pm 0.25 \text{ Gt a}^{-1}$ . For the glacier discharging into  
615 | SCAR Inlet ice shelf the losses were modest.

616 | The period of decreasing flow velocities and frontal advance coincides with several years when ~~the~~  
617 | ice mélange and sea ice cover persisted in pro-glacial fjords during summer. Considering the  
618 | ongoing mass depletion of the main glaciers and the increase of ungrounded glacier area due to  
619 | thinning, we expect recurrence of periods with frontal retreat and increasing calving fluxes, in  
620 | particular for those glaciers that showed major temporal variations in ice flow during the last  
621 | several years.

622 | In Larsen A embayment large fluctuations in velocity were observed for Drygalski Glacier, and in  
623 | Larsen B embayment for Hektoria and Green glaciers. These are the glaciers with the main share in  
624 | the overall mass losses of the region: Drygalski Glacier contributed 61 % to the 2011 to 2016 mass  
625 | deficit of the Larsen A/PGC outlet glaciers, and HG glaciers accounted for 67 % of the mass deficit  
626 | of the Larsen B glaciers. On HG glaciers the ice flow accelerated significantly in 2010/2011,  
627 | triggering elevation losses up to  $19.5 \text{ m a}^{-1}$  on the lower terminus during the period 2011 to 2013.  
628 | HG glaciers have a joint broad calving front and the frontal sections are ungrounded, thus being  
629 | more vulnerable to changes in atmospheric and oceanic boundary conditions than glaciers that are  
630 | confined in narrow valleys.

631 | Complementary to DEM differencing, we applied the input/output mass budget method to derive the  
632 | mass balance of the main glaciers. The mass balance numbers of these two independent methods  
633 | show good agreement, affirming the soundness of the reported results. The agreement backs up also  
634 | the reliability of the RACMO SMB data. A strong indicator for the good quality of the TDM SEC  
635 | products is the good agreement with 2011-2016 SEC data measured by the airborne laser scanner of  
636 | NASA IceBridge. Both data sets were independently processed. The agreement indicates that SAR  
637 | signal penetration does not affect the retrieval of surface elevation change on glaciers by InSAR  
638 | DEM differencing if repeat observation data are acquired over snow/ice media with stable  
639 | backscatter properties under the same observation geometry.

640

641 | *Data availability.* Data sets used in this study will be made available upon publication of the final  
642 | version on <http://cryoportal.enveo.at/>

643 | *Competing interests.* The authors declare that they have no conflict of interest.

644

645 | *Acknowledgements.* The TerraSAR-X data and TanDEM-X data were made available by DLR

646 through projects HYD1864, XTI\_GLAC1864, XTI\_GLAC6809 and DEM\_GLA1059. Sentinel- 1  
647 data were obtained through the ESA Sentinel Scientific Data Hub, ALOS PALSAR data through the  
648 ESA ALDEN AOALO 3741 project. Landsat 8 images, available at USGS Earth Explorer, were  
649 downloaded via Libra browser. The IceBridge ATM L4 Surface Elevation Rate of Change and  
650 IceBridge MCoRDS Ice Thickness version V001 data were downloaded from the NASA  
651 Distributed Active Archive Center, US National Snow and Ice Data Center (NSIDC), Boulder,  
652 Colorado. We wish to thank A. Cook (Univ. Swansea, UK) for providing outlines of glacier basins.  
653 The work was supported by the European Space Agency, ESA Contract No. 4000115896/15/I-LG,  
654 High Resolution SAR Algorithms for Mass Balance and Dynamics of Calving Glaciers (SAMBA).

655

## 656 **References**

657 Abdel Jaber, W.: Derivation of mass balance and surface velocity of glaciers by means of high  
658 resolution synthetic aperture radar: application to the Patagonian Icefields and Antarctica, Doctoral  
659 Thesis, Technical University of Munich, DLR Research Report 2016-54, 236 pp, 2016.

660 [Amundson, J. M., Fahnestock, M., Truffer, M., Brown, J., Lüthi, M.P., and Motyka, R.J.: Ice](#)  
661 [mélange dynamics and implications for terminus stability, Jakobshavn Isbræ, Greenland, J.](#)  
662 [Geophys. Res., 115, F01005, doi:10.1029/2009JF001405, 2016.](#)

663 Berthier, E., Scambos, T. A., and Shuman, C. A.: Mass loss of Larsen B tributary glaciers (Antarctic  
664 Peninsula) unabated since 2002, *Geophys. Res. Lett.*, 39, L13501L13501,  
665 doi:10.1029/2012GL051755, 2012.

666 [Cape, M. R., Vernet, M., Skarca, P., Marinsek, S., Scambos, T., and Domack, E.: Foehn winds link](#)  
667 [climate-driven warming to ice shelf evolution in Antarctica. \*J. Geophys. Res. Atmos.\*, 120, 11037–](#)  
668 [11057 \(doi: 10.1002/2015JD023465\), 2015.](#)

669 [Clem, K. R., Renwick, J. A., McGregor, J. and Fogt L. R.: The relative influence of ENSO and](#)  
670 [SAM on Antarctic Peninsula climate, \*J. Geophys. Res. Atmos.\*, 121, 9324 – 9341,](#)  
671 [doi:10.1002/2016JD025305, 2016.](#)

672 Cook, A. J., Murray, T., Luckman, A., Vaughan, D. G., and Barrand, N. E.: A new 100-m digital  
673 elevation model of the Antarctic Peninsula derived from ASTER Global DEM: Methods and  
674 accuracy assessment, *Earth Syst. Sci. Data*, 4, 129–142, doi:10.5194/essd-4-129-2012, 2012.

675 Cook, A. J., Vaughan, D. G., Luckman, A., and Murray, T.: A new Antarctic Peninsula glacier basin  
676 inventory and observed area changes since the 1940s, *Antarctic Science*, 26(6), 614-624, 2014.

677 De Rydt, J., Gudmundsson, G. H., Rott, H., and Bamber, J. L.: Modelling the instantaneous



678 response of glaciers after the collapse of the Larsen B Ice Shelf, *Geophys. Res. Lett.*, 42(13), 5355–  
679 5363, doi: 10.1002/2015GL064355, 2015.

680 De Angelis, H. and Skvarca, P.: Glacier surge after ice shelf collapse, *Science*, 299 (5612), 1560–  
681 1562, doi:10.1126/science.1077987, 2003.

682 Farinotti, D., Corr, H. F. J., and Gudmundsson, G. H.: The ice thickness distribution of Flask  
683 Glacier, Antarctic Peninsula, determined by combining radio-echo soundings, surface velocity data  
684 and flow modelling, *Ann. Glaciol.*, 54 (63), doi:10.3189/2013AoG63A603, 2013.

685 Farinotti, D., King, E. C., Albrecht, A., Huss, M., and Gudmundsson, G. H.: The bedrock  
686 topography of Starbuck Glacier, Antarctic Peninsula, as measured by ground based radio-echo  
687 soundings, *Ann. Glaciol.*, 55, 22–28, 2014.

688 Glasser, N. F. and Scambos, T. A.: A structural glaciological analysis of the 2002 Larsen B ice-shelf  
689 collapse, *J. Glaciol.*, 54, 3–16, 2008.

690 Hulbe, C. L., Scambos, T. A., Youngberg, T., and Lamb, A.K.: Patterns of glacier response to  
691 disintegration of the Larsen B ice shelf, Antarctic Peninsula, *Global Planet. Change*, 63(1), 1–8,  
692 2008.

693 Khazendar, A., Borstad, C. P., Scheuchl, B., Rignot, E., and Seroussi, H.: The evolving instability of  
694 the remnant Larsen B Ice Shelf and its tributary glaciers, *Earth and Planetary Science Letters*,  
695 419(199), 2015.

696 Krieger, G., Zink, M., Bachmann, M., Bräutigam, B., Schulze, D., Martone, M., Rizzoli, P.,  
697 Steinbrecher, U., Anthony, J. W., De Zan, F., Hajsek, I., Papathanassiou, K., Kugler, F., Rodriguez  
698 Cassola, M., Younis, M., Baumgartner, S., Lopez Dekker, P., Prats, P., and Moreira, A.: TanDEM-X:  
699 a radar interferometer with two formation flying satellites, *Acta Astronaut.*, 89, 83–98,  
700 doi:10.1016/j.actaastro.2013.03.008, 2013.

701 Lachaise, M. and Fritz, T.: Phase unwrapping strategy and assessment for the high resolution DEMs  
702 of the TanDEM-X mission, in: *Proc. of IEEE Geoscience and Remote Sensing Symposium*  
703 *(IGARSS)*, 10-15 July 2016, Beijing, China, pp. 3223-3226, 2016.

704 [Leeson, A. A., Van Wessem, J. M., Ligtenberg, S. R. M., Shepherd, A., Van den Broeke, M. R.,](#)  
705 [Killick, R., Skvarca, P., Marinsek, S., and Colwell, S.: Regional climate of the Larsen B embayment](#)  
706 [1980–2014, \*Journal of Glaciology\*, 63\(240\), 683-690. <http://doi.org/10.1017/jog.2017.39>, 2017.](#)

707 Leuschen, C., Gogineni, P., Rodriguez-Morales, F., Paden, J., and Allen, C.: IceBridge MCoRDS L2  
708 Ice Thickness, Boulder, Colorado USA. NASA National Snow and Ice Data Center Distributed  
709 Active Archive Center, doi: <http://dx.doi.org/10.5067/GDQ0CUCVTE2Q>, 2010, updated 2016.



710 Nagler, T., Rott, H., Hetzenecker, M., Wuite, J., and Potin, P.: The Sentinel-1 Mission: New  
711 opportunities for ice sheet observations, *Remote Sensing*, 7(7), 9371-9389;  
712 doi:10.3390/rs70709371, 2015.

713 Oliva, M., Navarro, F., Hrbáček, F., Hernández, A., Nývlt, D., Pereira, P., Ruiz-Fernández, J., and  
714 Trigo, R.: Recent regional climate cooling on the Antarctic Peninsula and associated impacts on the  
715 cryosphere, *Sci. Total Environ.*, 580, 210–223, doi:10.1016/j.scitotenv.2016.12.030, 2017.

716 Paterson, W. S. B.: *The physics of glaciers*, Third Edition, Oxford, etc., Elsevier, 1994.

717 Pfeffer, W. T.: A simple mechanism for irreversible tidewater glacier retreat, *J. Geophys. Res.-Earth*,  
718 112, F03S25, doi:10.1029/2006JF000590, 2007.

719 Rack, W. and Rott, H.: Pattern of retreat and disintegration of Larsen B Ice Shelf, Antarctic  
720 Peninsula, *Ann. Glaciol.*, 39, 505-510, 2004.

721 Rack W., Rott, H., Skvarca, P., and Siegel, A.: The motion field of northern Larsen Ice Shelf derived  
722 from satellite imagery, *Ann. Glaciol.*, 29, 261-266, 1999.

723 Rignot, E., Casassa, G., Gogineni, P., Rivera, A., and Thomas, R.: Accelerated ice discharges from  
724 the Antarctic Peninsula following the collapse of the Larsen B Ice Shelf, *Geophys. Res. Lett.*, 31,  
725 L18401, doi:10.1029/2004GL020697, 2004.

726 Rizzoli, P., Bräutigam, B., Kraus, T., Martone, M., and Krieger, G.: Relative height error analysis of  
727 TanDEM-X elevation data, *ISPRS J. Photogrammet. Remote Sens.*, 73, 30–38, 2012.

728 Rizzoli, P., Martone, M., Rott, H., and Moreira, A.: Characterization of snow facies on the  
729 Greenland Ice Sheet observed by TanDEM-X interferometric SAR data, *Remote Sens.*, 9 (4), 315;  
730 doi:10.3390/rs9040315, 2017.

731 Rossi, C., Rodriguez Gonzalez, F., Fritz, T., Yague-Martinez, N., and Eineder, M.: TanDEM-X  
732 calibrated Raw DEM generation, *ISPRS J. Photogrammet. Remote Sens.*, 73, 12 - 20, doi:  
733 10.1016/j.isprsjprs.2012.05.014, 2012.

734 Rott, H.: Advances in interferometric synthetic aperture radar (InSAR) in earth system science,  
735 *Progress in Phys. Geogr.*, 33(6), 769-791, doi: 10.1177/0309133309350263, 2009.

736 Rott, H., Skvarca, P., and Nagler, T: Rapid collapse of Northern Larsen Ice Shelf, *Antarctica*,  
737 *Science*, 271, 788–792, 1996.

738 Rott H., Rack, W., Nagler, T., and Skvarca, P.: Climatically induced retreat and collapse of Northern  
739 Larsen Ice Shelf, Antarctic Peninsula, *Ann. Glaciol.*, 27, 86-92, 1998.

740 Rott, H., Rack, W., Skvarca, P., and De Angelis, H.: Northern Larsen Ice Shelf, Antarctica: Further

741 retreat after collapse, *Ann. Glaciol.*, 34, 277–282, 2002.

742 Rott, H., Müller, F., Nagler, T., and Floricioiu, D.: The imbalance of glaciers after disintegration of  
743 Larsen B Ice Shelf, Antarctic Peninsula, *The Cryosphere*, 5 (1), 125–134, doi:10.5194/tc-5-125-  
744 2011, 2011.

745 Rott, H., Floricioiu, D., Wuite, J., Scheiblauer, S., Nagler, T., and Kern, M.: Mass changes of outlet  
746 glaciers along the Nordenskjöld Coast, northern Antarctic Peninsula, based on TanDEM-X satellite  
747 measurements, *Geophys. Res. Lett.*, 41, doi:10.1002/2014GL061613, 2014.

748 Royston, S., and Gudmundsson, G. H.: Changes in ice-shelf buttressing following the collapse of  
749 Larsen A Ice Shelf, Antarctica, and the resulting impact on tributaries, *J. Glaciol.*, 62(235) 905–911,  
750 2016.

751 Scambos, T. A., Bohlander, J. A., Shuman, C. A., and Skvarca, P.: Glacier acceleration and thinning  
752 after ice shelf collapse in the Larsen B embayment, Antarctica, *Geophys. Res. Lett.*, 31, L18402,  
753 doi:10.1029/2004GL020670, 2004.

754 Scambos, T. A., Berthier, E., and Shuman, C. A.: The triggering of subglacial lake drainage during  
755 rapid glacier drawdown: Crane Glacier, Antarctic Peninsula, *Ann. Glaciol.*, 52(59), 74–82, 2011.

756 Scambos, T. A., Berthier, E., Haran, T., Shuman, C. A., Cook, A. J., Ligtenberg, S. R. M., and  
757 Bohlander, J.: Detailed ice loss pattern in the northern Antarctic Peninsula: widespread decline  
758 driven by ice front retreats, *The Cryosphere*, 8, 2135–2145, doi:10.5194/tc-8-2135-2014, 2014.

759 Schwerdt, M., Bräutigam, B., Bachmann, M., Döring, B., Schrank, D., Gonzalez, J. H.: Final  
760 TerraSAR-X calibration results based on novel efficient methods, *IEEE Trans. Geosc. Rem. Sens.*,  
761 48 (2), 677–689, 2010.

762 Seehaus, T., Marinsek, S., Helm, V., Skvarca, P., and Braun, M.: Changes in ice dynamics, elevation  
763 and mass discharge of Dinsmoor–Bombardier–Edgeworth glacier system, Antarctic Peninsula,  
764 *Earth Planet. Sci. Lett.* 427, 125–135. doi: 10.1016/j.epsl.2015.06.047, 2015.

765 Seehaus, T. C., Marinsek, S., Skvarca, P., van Wessem, J. M., Reijmer, C. H., Seco, J. L., and Braun,  
766 M. H.: Dynamic response of Sjøgren Inlet glaciers to ice shelf breakup - a remote sensing data  
767 analysis, *Front. Earth Sci.* 4:66, doi: 10.3389/feart.2016.00066, 2016.

768 Shuman, C. A., Berthier, E., and Scambos, T. A.: 2001–2009 elevation and mass losses in the  
769 Larsen A and B embayments, Antarctic Peninsula, *J. Glaciol.*, 57, 737–754, 2011.

770 Studinger, M. S: IceBridge ATM L4 Surface Elevation Rate of Change, Version 1, Subset M699,  
771 S10, NASA Distributed Active Archive Center, National Snow and Ice Data Center, Boulder,  
772 Colorado USA, 2014, updated 2017, doi: <http://dx.doi.org/10.5067/BCW6CI3TXOCY>, [Accessed

773 25 July 2017].

774 [Todd, J. and Christoffersen, P.: Are seasonal calving dynamics forced by buttressing from ice](#)  
775 [mélange or undercutting by melting? Outcomes from full-Stokes simulations of Store Glacier, West](#)  
776 [Greenland, \*The Cryosphere\*, 8, 2353-2365, <https://doi.org/10.5194/tc-8-2353-2014>, 2014.](#)

777 Torres, R., Snoeij, P., Geudtner, D., Bibby, D., Davidson, M., Attema, E., Potin, P., Rommen, B.,  
778 Flourey, N., Brown, M., Navas Travera, I., Deghaye, P., Duesmann, B., Rosich, B., Miranda, N.,  
779 Bruno, C., L'Abbate, M., Croci, R., Pietropaolo, A., Huchler, M., Rostan, F.: GMES Sentinel-1  
780 mission, *Remote Sens. Environ.*, 120, 9–24, 2012.

781 Turner, J., Lu, H., White, I., King, J. C., Phillips, T., Hosking, J. S., Bracegirdle, T. J., Marshall, G.  
782 J., Mulvaney, R. and Deb, P.: Absence of 21<sup>st</sup> century warming on Antarctic Peninsula consistent  
783 with natural variability, *Nature*, 535, 411–415, doi:10.1038/nature18645, 2016.

784 van Wessem, J. M., Ligtenberg, S. R. M., Reijmer, C. H., van de Berg, W. J., van den Broeke, M.  
785 R., Barrand, N. E., Thomas, E. R., Turner, J., Wuite, J., Scambos, T. A., and van Meijgaard, E.: The  
786 modelled surface mass balance of the Antarctic Peninsula at 5.5 km horizontal resolution, *The*  
787 *Cryosphere*, 10, 271-285, 2016.

788 van Wessem, J. M., van de Berg, W. J., Noël, B. P. Y., van Meijgaard, E., Birnbaum, G., Jakobs, C.  
789 L., Krüger, K., Lenaerts, J. T. M., Lhermitte, S., Ligtenberg, S. R. M., Medley, B., Reijmer, C. H.,  
790 van Tricht, K., Trusel, L. D., van Ulf, L. H., Wouters, B., Wuite, J., and van den Broeke, M. R.:  
791 Modelling the climate and surface mass balance of polar ice sheets using RACMO2, part 2:  
792 Antarctica (1979–2016), *The Cryosphere Discuss.*, <https://doi.org/10.5194/tc-2017-202>, in review,  
793 2017.

794 Walter Antony, J. M., Schmidt, K., Schwerdt, M., Polimeni, D., Tous Ramon, N., Bachmann M.,  
795 and Gabriel Castellanos, A.: Radiometric accuracy and stability of TerraSAR-X and TanDEM-X,  
796 *Proceedings of the European Conference on Synthetic Aperture Radar (EUSAR)*, 6 – 9 June 2016,  
797 Hamburg, Germany.

798 [Walter, J. I., Jason, E., Tulaczyk, S., Brodsky, E. E., Howat, I. M., Yushin, A. H. N., and Brown, A.:](#)  
799 [Oceanic mechanical forcing of a marine-terminating Greenland glacier, \*Ann. Glaciol.\*, 53, 181–192,](#)  
800 [2012.](#)

801 Wuite, J., Rott, H., Hetzenecker, M., Floricioiu, D., De Rydt, J., Gudmundsson, G. H., Nagler, T.,  
802 and Kern, M.: Evolution of surface velocities and ice discharge of Larsen B outlet glaciers from  
803 1995 to 2013, *The Cryosphere*, 9, 957-969, doi:10.5194/tc-9-957-2015, 2015.

804

805 **Tables**

806 **Table 1.** Rates of surface elevation change, volume change and mass balance by means of TDM  
 807 DEM differencing 2013 to 2016, for glacier basins discharging into Prince-Gustav-Channel, Larsen  
 808 Inlet and Larsen A embayment.  $dh/dt$  is the mean rate of elevation change of the area covered by  
 809 the high resolution map (Fig. 42). The basin area refers to ice front positions delineated in  
 810 TanDEM-X images of 2016-07-16, 2016-07-27, 2016-08-18. The rates of ice volume change  
 811 ( $dV/dt$ ) and total mass balance ( $dM/dt$ ) refer to grounded ice. \* $dM/dt$  2011-2013 for grounded areas  
 812 of basins A1 to A7 from the TDM SEC analysis by Rott et al., (2014).

| ID | Basin name             | Basin area [km <sup>2</sup> ] | $dh/dt$ map [km <sup>2</sup> ] | $dh/dt$ [m a <sup>-1</sup> ] | $dV/dt$ [km <sup>3</sup> a <sup>-1</sup> ] | Uncertainty [km <sup>3</sup> a <sup>-1</sup> ] | $dM/dt$ [Gt a <sup>-1</sup> ] 2013-16 | * $dM/dt$ [Gt a <sup>-1</sup> ] 2011-13 |
|----|------------------------|-------------------------------|--------------------------------|------------------------------|--------------------------------------------|------------------------------------------------|---------------------------------------|-----------------------------------------|
| A1 | Cape Longing Peninsula | 668.9                         | 576.9                          | -0.257                       | -0.146                                     | ±0.041                                         | -0.131                                | -0.150                                  |
| A2 | Sjögren-Boydell (SB)   | 527.6                         | 188.0                          | -1.239                       | -0.241                                     | ±0.046                                         | -0.217                                | -0.364                                  |
| A3 | APPE glaciers          | 513.6                         | 231.9                          | -0.137                       | -0.032                                     | ±0.052                                         | -0.029                                | +0.056                                  |
| A4 | DBE glaciers           | 653.9                         | 194.3                          | -0.286                       | -0.063                                     | ±0.058                                         | -0.057                                | -0.396                                  |
| A5 | Sobral Peninsula       | 257.9                         | 198.5                          | -0.173                       | -0.034                                     | ±0.018                                         | -0.031                                | -0.145                                  |
| A6 | Cape Worsley coast     | 625.1                         | 291.4                          | -0.742                       | -0.217                                     | ±0.051                                         | -0.195                                | -0.800                                  |
| A7 | Drygalski Glacier      | 998.3                         | 604.7                          | -3.187                       | -1.913                                     | ±0.074                                         | -1.722                                | -2.179                                  |
|    | <i>Total</i>           | 4245.3                        | 2285.7                         |                              | -2.646                                     | ±0.199                                         | -2.382                                | -3.978                                  |

813

814 **Table 2.** (a) Area extent of floating ice in 2016; (b) and (c) rate of surface elevation change and  
 815 volume change 2013 to 2016 of floating ice (excluding the areas of frontal advance); (d) and (e)  
 816 extent and volume of frontal advance (+) or retreat (-) areas.

| ID | Basin name         | (a) Floating area [km <sup>2</sup> ] | (b) Mean $dh/dt$ [m a <sup>-1</sup> ] | (c) Mean $dV/dt$ [km <sup>3</sup> a <sup>-1</sup> ] | (d) Advance/retreat area [km <sup>2</sup> ] | (e) Volume [km <sup>3</sup> ] |
|----|--------------------|--------------------------------------|---------------------------------------|-----------------------------------------------------|---------------------------------------------|-------------------------------|
| A2 | Sjögren-Boydell    | 6.09                                 | +1.250                                | 0.062                                               | +1.96                                       | +0.403                        |
| A4 | DBE glaciers       | 56.22                                | +0.131                                | 0.060                                               | +11.74                                      | +2.017                        |
| A6 | Cape Worsley coast | 4.89                                 | +0.194                                | 0.008                                               | +2.92                                       | +0.550                        |
| A7 | Drygalski Glacier  | 4.57                                 | -2.231                                | -0.082                                              | -1.40                                       | -0.360                        |

817

818 **Table 3.** Mean specific surface mass balance,  $b_n$ , for 2011 to 2016, and rates of surface mass  
819 balance (SMB), calving flux (CF) and mass balance by ~~IOM~~ the mass budget method (MB) in Gt a<sup>-1</sup>  
820 <sup>1</sup> for the periods 2011 to 2013 and 2013 to 2016 for outlet glaciers north of Seal Nunataks.

| ID | Glacier   | $b_n$ 11-16<br>kg m <sup>-2</sup> a <sup>-1</sup> | SMB 2011-<br>13 Gt a <sup>-1</sup> | SMB 2013-<br>16 Gt a <sup>-1</sup> | CF 2011-<br>13 Gt a <sup>-1</sup> | CF 2013-<br>16 Gt a <sup>-1</sup> | MB 2011 -13<br>Gt a <sup>-1</sup> | MB 2013 -16<br>Gt a <sup>-1</sup> |
|----|-----------|---------------------------------------------------|------------------------------------|------------------------------------|-----------------------------------|-----------------------------------|-----------------------------------|-----------------------------------|
| A2 | SB        | 653                                               | 0.314                              | 0.362                              | 0.861                             | 0.673                             | -0.547±0.144                      | -0.311±0.119                      |
| A3 | APPE      | 903                                               | 0.446                              | 0.470                              | 0.517                             | 0.488                             | -0.071±0.088                      | -0.018±0.089                      |
| A4 | DBE       | 982                                               | 0.624                              | 0.646                              | 0.980                             | 0.748                             | -0.356±0.181                      | -0.102±0.153                      |
| A7 | Drygalski | 1383                                              | 1.398                              | 1.374                              | 3.687                             | 3.177                             | -2.289±0.619                      | -1.803±0.544                      |

821 **Table 4.** Rate of surface elevation change for areas by means of TDM DEM differencing 2011 to  
822 2013 for glacier basins of the Larsen B embayment. dh/dt is the mean rate of elevation change of  
823 the area covered by the high resolution map (Fig. 56). The basin area refers to ice front positions  
824 delineated in TanDEM-X images of 2013-06-20 and 2013-07-01. The rates of ice volume change  
825 (dV/dt) and total mass balance (dM/dt) refer to grounded ice.

| ID  | Basin name              | Total basin<br>area [km <sup>2</sup> ] | TDM<br>surveyed area<br>[km <sup>2</sup> ] | Mean<br>dh/dt<br>[m a <sup>-1</sup> ] | dV/dt<br>[km <sup>3</sup> a <sup>-1</sup> ] | Uncertainty<br>[km <sup>3</sup> a <sup>-1</sup> ] | dM/dt<br>[Gt a <sup>-1</sup> ] |
|-----|-------------------------|----------------------------------------|--------------------------------------------|---------------------------------------|---------------------------------------------|---------------------------------------------------|--------------------------------|
| B1  | West of SN              | 638.1                                  | 494.1                                      | -0.693                                | -0.342                                      | ±0.063                                            | -0.308                         |
| B2  | Hektoria Green          | 1167.5                                 | 491.8                                      | -8.844                                | -4.312                                      | ±0.145                                            | -3.881                         |
| B3  | Evans                   | 266.9                                  | 137.3                                      | -2.700                                | -0.364                                      | ±0.032                                            | -0.328                         |
| B4  | Evans Headland          | 117.7                                  | 106.8                                      | -0.476                                | -0.051                                      | ±0.011                                            | -0.046                         |
| B5  | Punchbowl               | 119.9                                  | 84.2                                       | -0.761                                | -0.064                                      | ±0.013                                            | -0.058                         |
| B6  | Jorum                   | 460.3                                  | 110.6                                      | -2.157                                | -0.239                                      | ±0.063                                            | -0.215                         |
| B7  | Crane                   | 1322.6                                 | 343.8                                      | -2.318                                | -0.805                                      | ±0.179                                            | -0.724                         |
| B8  | Larsen B coast          | 142.6                                  | 95.8                                       | -0.085                                | -0.046                                      | ±0.016                                            | -0.041                         |
| B9  | Mapple                  | 155.4                                  | 92.4                                       | -0.524                                | -0.048                                      | ±0.018                                            | -0.043                         |
| B10 | Melville                | 291.5                                  | 139.9                                      | -0.859                                | -0.120                                      | ±0.036                                            | -0.108                         |
| B11 | Pequod                  | 150.3                                  | 115.1                                      | +0.025                                | +0.003                                      | ±0.015                                            | +0.003                         |
|     | <i>Total B1 to B11</i>  | <i>4832.9</i>                          | <i>2211.6</i>                              |                                       | <i>-6.388</i>                               | <i>±0.495</i>                                     | <i>-5.749</i>                  |
| B12 | Rachel                  | 51.8                                   | 38.9                                       | -0.046                                | -0.002                                      | ±0.006                                            | -0.002                         |
| B13 | Starbuck                | 299.4                                  | 169.4                                      | -0.118                                | -0.020                                      | ±0.035                                            | -0.018                         |
| B14 | Stubb                   | 108.3                                  | 87.9                                       | +0.116                                | -0.001                                      | ±0.011                                            | -0.001                         |
| B15 | SCAR IS coast           | 136.8                                  | 102.4                                      | -0.184                                | -0.019                                      | ±0.014                                            | -0.017                         |
| B16 | Flask                   | 1130.6                                 | 516.3                                      | -0.629                                | -0.325                                      | ±0.138                                            | -0.292                         |
| B17 | Leppard                 | 1851.0                                 | 946.5                                      | -0.243                                | -0.230                                      | ±0.219                                            | -0.207                         |
|     | <i>Total B12 to B17</i> | <i>3577.9</i>                          | <i>1861.4</i>                              |                                       | <i>-0.597</i>                               | <i>±0.423</i>                                     | <i>-0.537</i>                  |

826 **Table 5.** Rate of surface elevation change for areas by means of TDM DEM differencing 2013 to  
827 2016 for glacier basins of the Larsen B embayment.  $dh/dt$  is the mean rate of elevation change of  
828 the area covered by the high resolution map (Fig. 67). The basin area refers to ice front positions  
829 delineated in TanDEM-X images of 2016-06-27 and 2016-08-01. The rates of ice volume change  
830 ( $dV/dt$ ) and total mass balance ( $dM/dt$ ) refer to grounded ice.

| ID  | Basin name              | Total basin area [km <sup>2</sup> ] | TDM surveyed area [km <sup>2</sup> ] | Mean $dh/dt$ [m a <sup>-1</sup> ] | $dV/dt$ [km <sup>3</sup> a <sup>-1</sup> ] | Uncertainty [km <sup>3</sup> a <sup>-1</sup> ] | $dM/dt$ [Gt a <sup>-1</sup> ] |
|-----|-------------------------|-------------------------------------|--------------------------------------|-----------------------------------|--------------------------------------------|------------------------------------------------|-------------------------------|
| B1  | West of SN              | 638.7                               | 485.6                                | -0.172                            | -0.084                                     | ±0.043                                         | -0.076                        |
| B2  | Hektoria Green          | 1215.7                              | 552.8                                | -3.092                            | -1.708                                     | ±0.099                                         | -1.538                        |
| B3  | Evans                   | 272.3                               | 165.3                                | -1.494                            | -0.238                                     | ±0.021                                         | -0.214                        |
| B4  | Evans Headland          | 117.7                               | 106.8                                | -0.331                            | -0.035                                     | ±0.007                                         | -0.032                        |
| B5  | Punchbowl               | 119.9                               | 84.2                                 | -0.488                            | -0.041                                     | ±0.009                                         | -0.037                        |
| B6  | Jorum                   | 461.4                               | 111.7                                | -0.989                            | -0.110                                     | ±0.042                                         | -0.099                        |
| B7  | Crane                   | 1333.4                              | 354.0                                | -0.753                            | -0.247                                     | ±0.120                                         | -0.222                        |
| B8  | Larsen B coast          | 142.6                               | 96.0                                 | -0.166                            | -0.016                                     | ±0.011                                         | -0.014                        |
| B9  | Mapple                  | 155.4                               | 92.8                                 | -0.240                            | -0.022                                     | ±0.012                                         | -0.020                        |
| B10 | Melville                | 292.9                               | 140.9                                | -0.584                            | -0.081                                     | ±0.024                                         | -0.073                        |
| B11 | Pequod                  | 150.6                               | 115.3                                | +0.069                            | 0.008                                      | ±0.011                                         | +0.007                        |
|     | <i>Total B1 to B11</i>  | <i>4900.2</i>                       | <i>2305.5</i>                        |                                   | <i>-2.574</i>                              | <i>±0.335</i>                                  | <i>-2.318</i>                 |
| B12 | Rachel                  | 51.8                                | 38.9                                 | +0.040                            | 0.002                                      | ±0.004                                         | +0.002                        |
| B13 | Starbuck                | 299.4                               | 169.4                                | +0.006                            | 0.001                                      | ±0.023                                         | +0.001                        |
| B14 | Stubb                   | 108.3                               | 87.9                                 | +0.115                            | 0.010                                      | ±0.007                                         | +0.009                        |
| B15 | SCAR IS coast           | 136.8                               | 102.4                                | -0.087                            | -0.009                                     | ±0.009                                         | -0.008                        |
| B16 | Flask                   | 1130.6                              | 516.3                                | -0.604                            | -0.312                                     | ±0.092                                         | -0.281                        |
| B17 | Leppard                 | 1851.0                              | 946.5                                | -0.345                            | -0.337                                     | ±0.146                                         | -0.303                        |
|     | <i>Total B12 to B17</i> | <i>3577.9</i>                       | <i>1861.5</i>                        |                                   | <i>-0.645</i>                              | <i>±0.281</i>                                  | <i>-0.580</i>                 |

831

832

833

834 **Table 6.** (a) Area extent of floating ice in 2013 (A) and 2016 (B); (b) and (c) rate of surface  
835 elevation change and volume change 2011 to 2013 (A) and 2013 to 2016 (B) of floating ice  
836 (excluding the areas of frontal advance); (d) and (e) extent and volume of frontal advance areas.

| ID                     | Basin name | (a)<br>Floating area<br>[km <sup>2</sup> ] | (b)<br>Mean dh/dt<br>[m a <sup>-1</sup> ] | (c)<br>Mean dV/dt<br>[km <sup>3</sup> a <sup>-1</sup> ] | (d)<br>Advance area<br>[km <sup>2</sup> ] | (e)<br>Volume [km <sup>3</sup> ] |
|------------------------|------------|--------------------------------------------|-------------------------------------------|---------------------------------------------------------|-------------------------------------------|----------------------------------|
| <b>(A) 2011 - 2013</b> |            |                                            |                                           |                                                         |                                           |                                  |
| B2                     | HG         | 19.81                                      | -1.920                                    | -0.308                                                  | 31.65                                     | 11.676                           |
| B3                     | Evans      | 5.55                                       | -1.264                                    | -0.057                                                  | 3.66                                      | 0.807                            |
| B6                     | Jorum      | 0.40                                       | +3.510                                    | +0.011                                                  | 0.54                                      | 0.134                            |
| B7                     | Crane      | 2.01                                       | +3.770                                    | +0.061                                                  | 4.96                                      | 2.164                            |
| <b>(B) 2013 - 2016</b> |            |                                            |                                           |                                                         |                                           |                                  |
| B2                     | HG         | 62.09                                      | -0.002                                    | -0.001                                                  | 47.96                                     | 11.270                           |
| B3                     | Evans      | 14.56                                      | -0.652                                    | -0.077                                                  | 5.39                                      | 0.931                            |
| B6                     | Jorum      | 1.15                                       | +0.305                                    | +0.003                                                  | 0.78                                      | 0.165                            |
| B7                     | Crane      | 7.99                                       | -2.620                                    | -0.169                                                  | 10.54                                     | 3.301                            |
| B10                    | Melville   | 0.88                                       | -0.966                                    | -0.007                                                  | 1.20                                      | 0.219                            |

837

838 **Table 7.** Mean specific surface mass balance ( $b_n$ ) 2011-2016, annual surface mass balance (SMB)  
839 and calving flux (CF) 2011-2013 and 2013-2016, and resulting ~~IOM~~ mass balance (MB) in Gt a<sup>-1</sup>  
840 for Larsen B glaciers.

| ID  | Glacier  | $b_n$ 11-16<br>kg m <sup>-2</sup> a <sup>-1</sup> | SMB 2011-<br>13 Gt a <sup>-1</sup> | SMB 2013-<br>16 Gt a <sup>-1</sup> | CF 2011-<br>13 Gt a <sup>-1</sup> | CF 2013-<br>16 Gt a <sup>-1</sup> | MB 2011 -13<br>Gt a <sup>-1</sup> | MB 2013 -16<br>Gt a <sup>-1</sup> |
|-----|----------|---------------------------------------------------|------------------------------------|------------------------------------|-----------------------------------|-----------------------------------|-----------------------------------|-----------------------------------|
| B2  | HG       | 1400                                              | 1.563                              | 1.644                              | 5.733                             | 3.389                             | -4.170±0.936                      | -1.745±0.590                      |
| B3  | Evans    | 562                                               | 0.137                              | 0.156                              | 0.389                             | 0.304                             | -0.252±0.065                      | -0.148±0.053                      |
| B6  | Jorum    | 884                                               | 0.376                              | 0.427                              | 0.457                             | 0.361                             | -0.081±0.092                      | +0.066±0.86                       |
| B7  | Crane    | 837                                               | 1.023                              | 1.159                              | 2.093                             | 1.565                             | -1.070±0.280                      | -0.406±0.247                      |
| B10 | Melville | 330                                               | 0.091                              | 0.100                              | 0.146                             | 0.144                             | -0.055±0.021                      | -0.044±0.022                      |
| B13 | Starbuck | 287                                               | 0.078                              | 0.091                              | 0.067                             | 0.068                             | +0.011±0.014                      | +0.023±0.016                      |
| B16 | Flask    | 693                                               | 0.722                              | 0.824                              | 1.085                             | 1.118                             | -0.363±0.163                      | -0.294±0.176                      |
| B17 | Leppard  | 500                                               | 0.874                              | 0.961                              | 1.760                             | 1.780                             | -0.886±0.237                      | -0.819±0.246                      |

841

842



843 **Figures**  
844

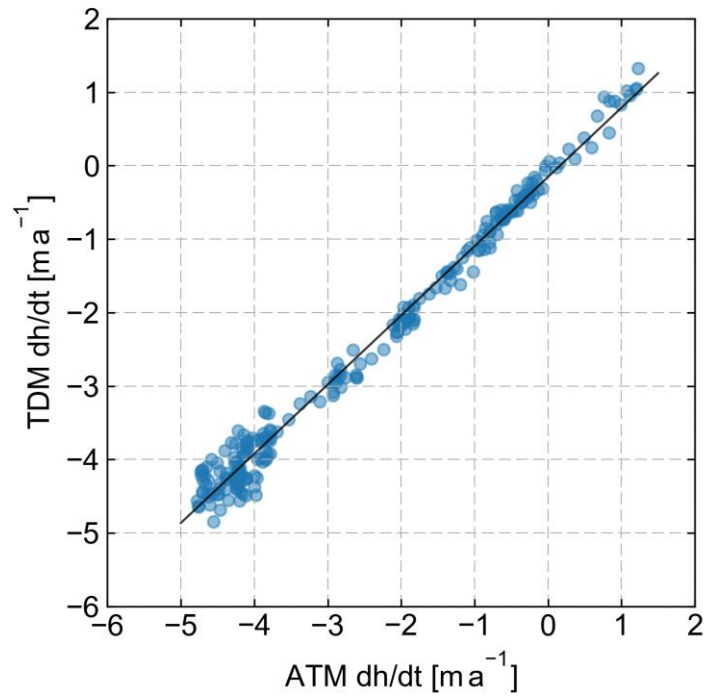

845  
846 **Figure 1.** Scatterplot of measurements of surface elevation change (dh/dt) 2016 - 2011 on the  
847 central flowline of Crane Glacier based on IceBrigde ATM and TanDEM-X elevation data. The line  
848 shows the linear fit.

849

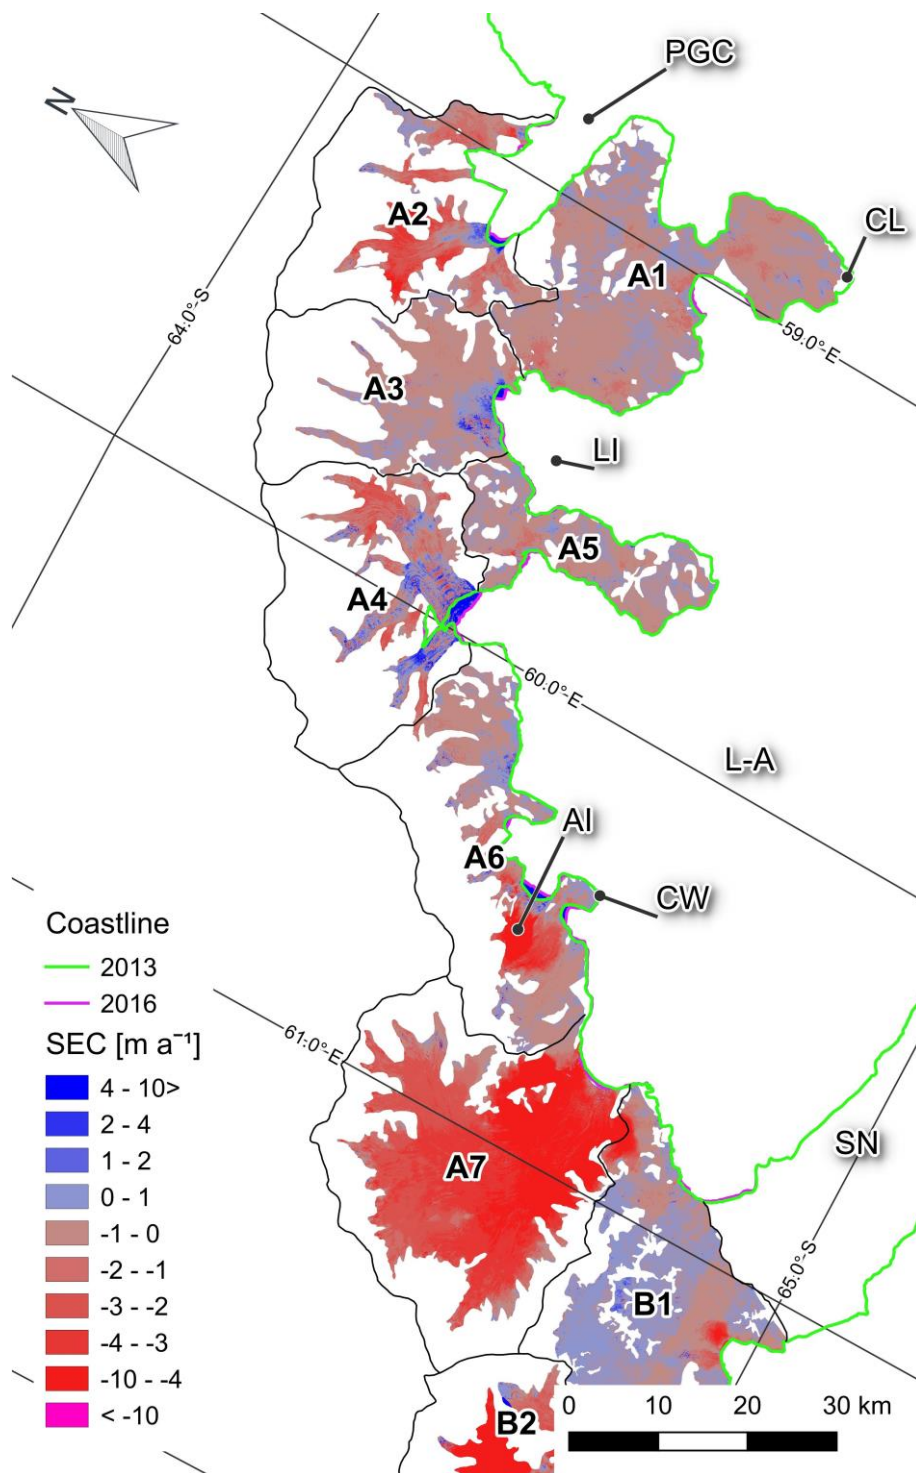

850

851 **Figure 12.** Map of surface elevation change  $dh/dt$  ( $\text{m a}^{-1}$ ) June/July 2013 to July/August 2016 on  
 852 glaciers north of Seal Nunataks (SN). AI – Arrol Icefall, CL – Cape Longing, CW – Cape Worsley,  
 853 L-A – Larsen A embayment, LI – Larsen Inlet, PGC – Prince-Gustav-Channel.

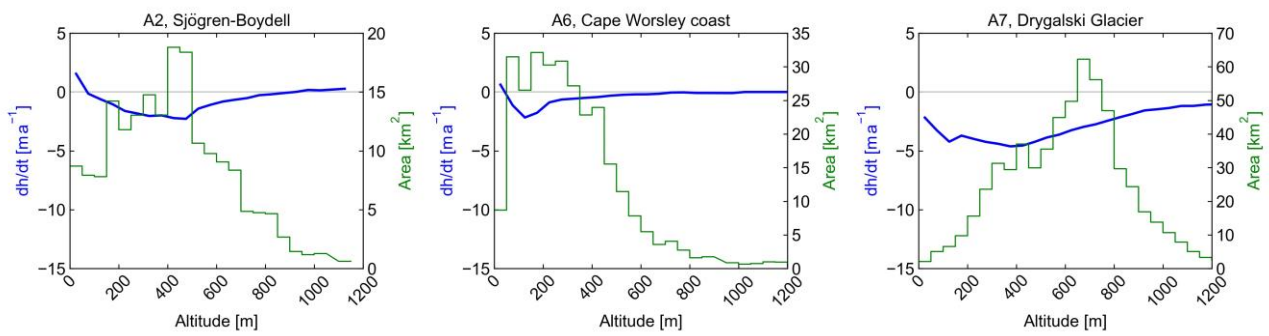

854

855 **Figure 23.** Rate of glacier surface elevation change  $dh/dt$  (in  $m a^{-1}$ ) 2013 to 2016 versus altitude in  
 856 50 m intervals for basins A2, A6 and A7. Green line: hypsometry of surveyed glacier area in  $km^2$ .

857

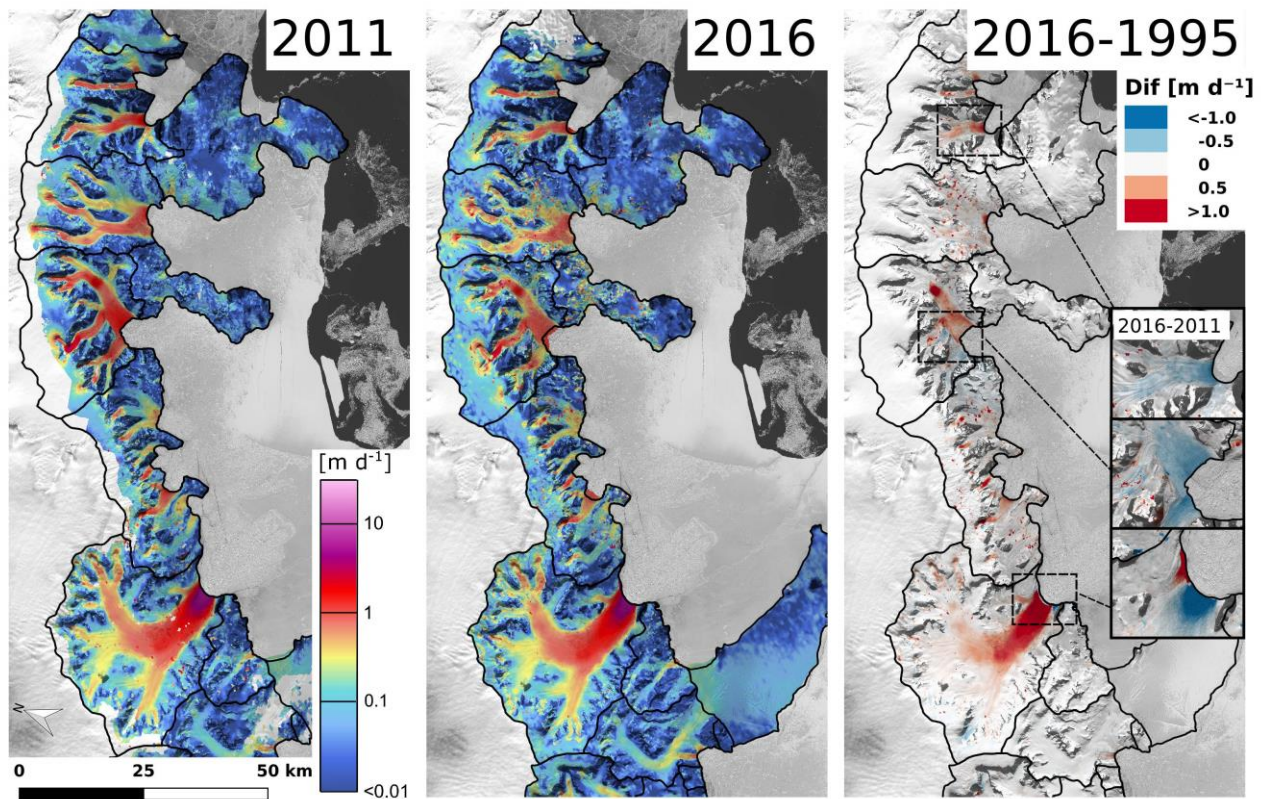

858

859 **Figure 34.** Magnitude of ice velocity  $[m d^{-1}]$  2011 and 2016 derived from TerraSAR-X and  
 860 TanDEM-X data. Gaps in 2011 filled with PALSAR data and in 2016 filled with Sentinel-1 data.  
 861 Right: Map of velocity difference 2016 minus 1995 (October/November). Insets: velocity difference  
 862 2016 minus 2011 for Sjögren, DBE and Drygalski glaciers.

863

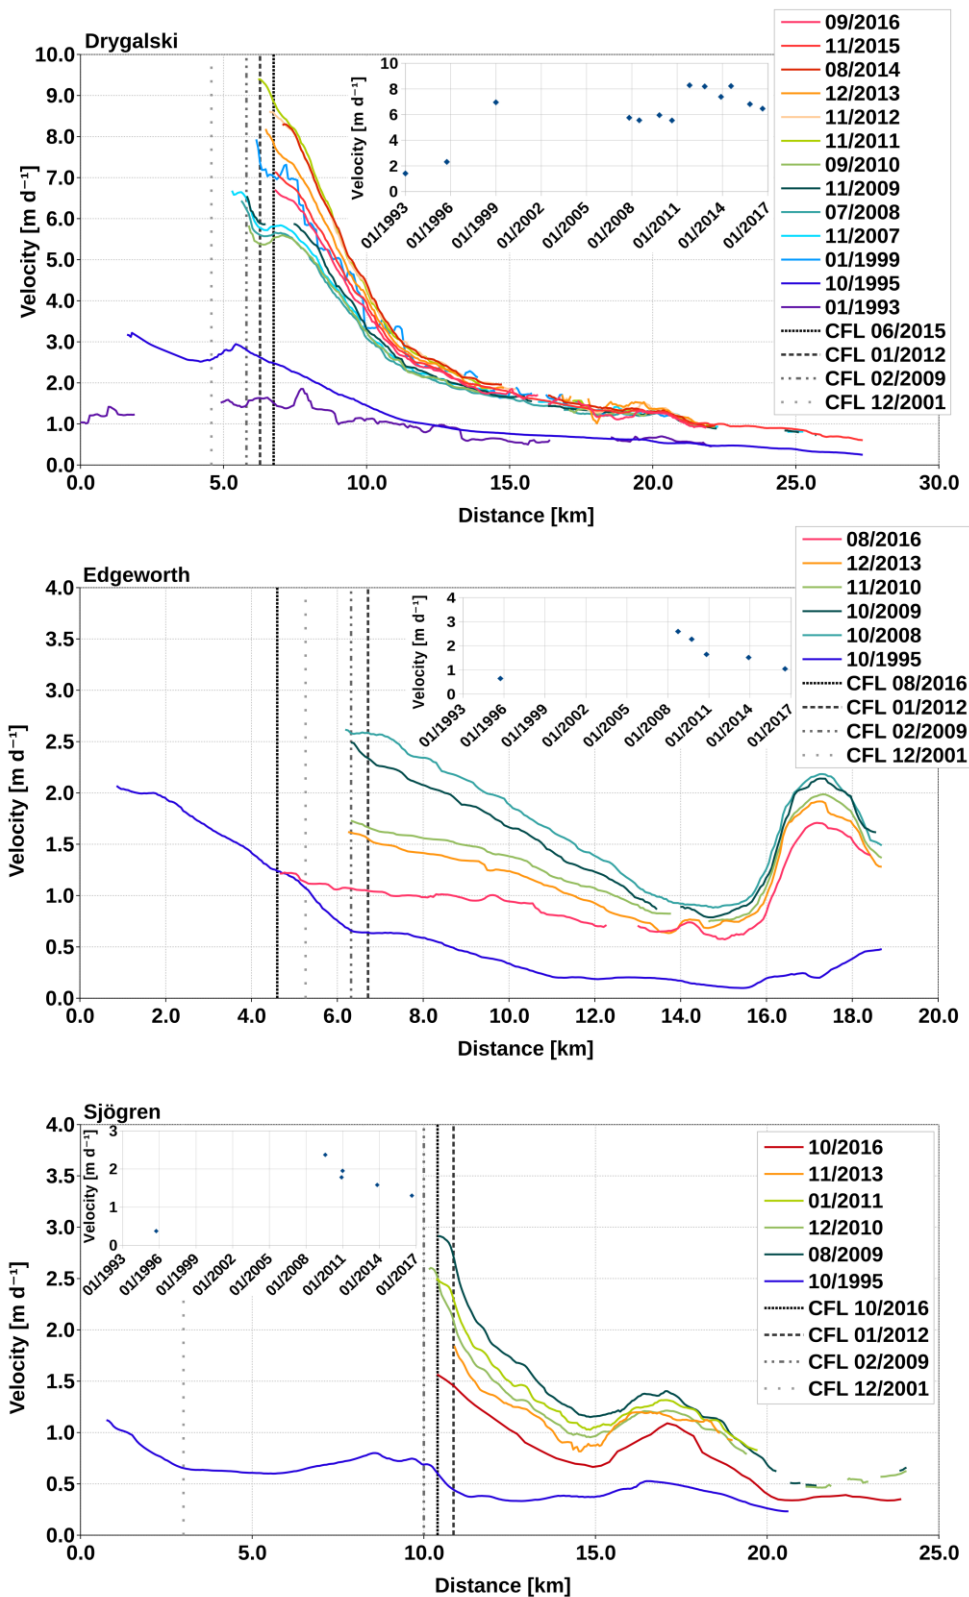

864

865 **Figure 5.** Surface velocities along the central flow lines of Drygalski, Edgeworth and Sjögren  
 866 glaciers and their frontal positions on different dates (month/year). The x- and y-scales are different  
 867 for individual glaciers. Vertical lines show positions of the calving front. The insets show velocities  
 868 in the centre of the flux gates.



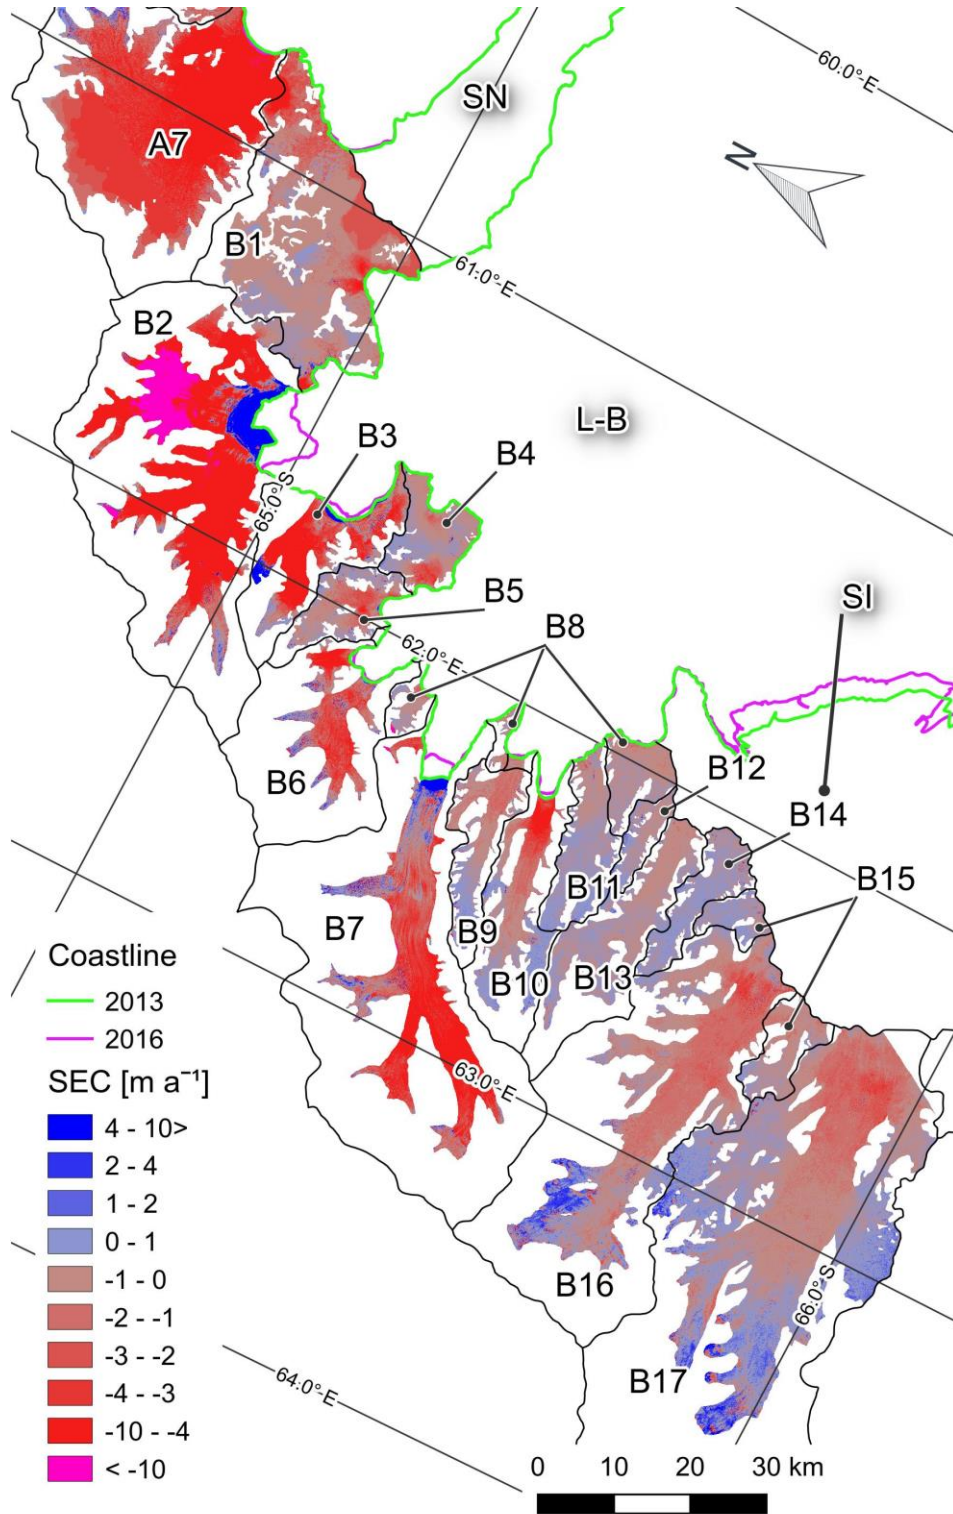

870

871 **Figure 56.** Map of surface elevation change (SEC  $\text{m a}^{-1}$ ) May/June 2011 to June/July 2013 on  
 872 glaciers of Larsen B embayment (L-B). SN – Seal Nunataks. SI – SCAR Inlet ice shelf.

873

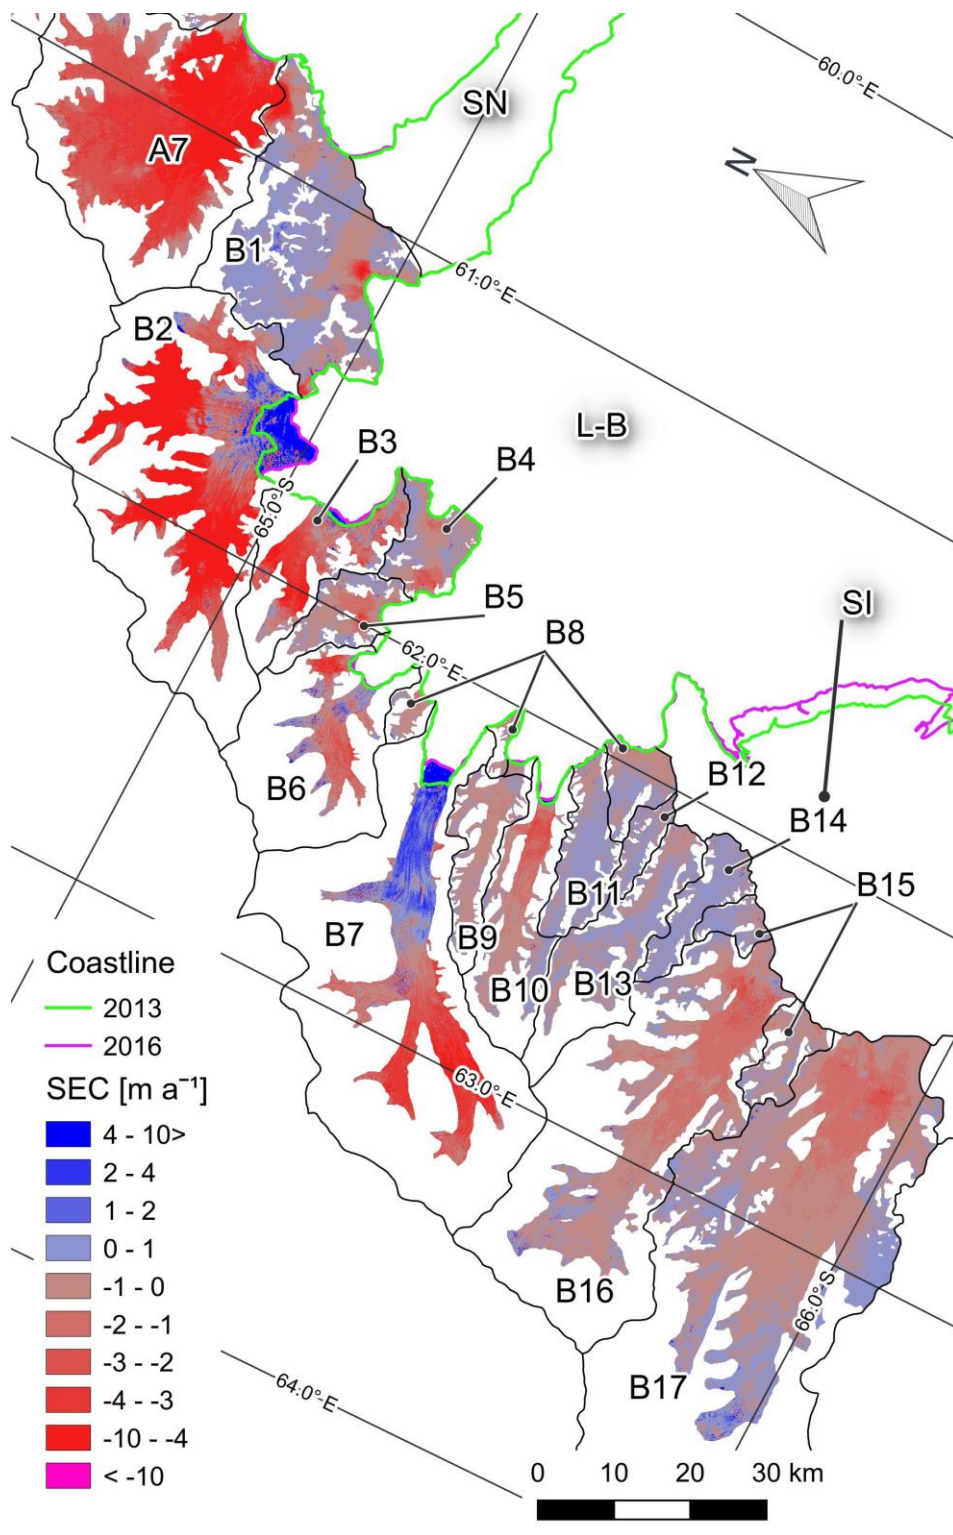

874

875 **Figure 67.** Map of surface elevation change (SEC  $\text{m a}^{-1}$ ) June/July 2013 to July/August 2016 on  
 876 glaciers of Larsen B embayment (L-B). SN – Seal Nunataks. SI -SCAR Inlet ice shelf.

877

878

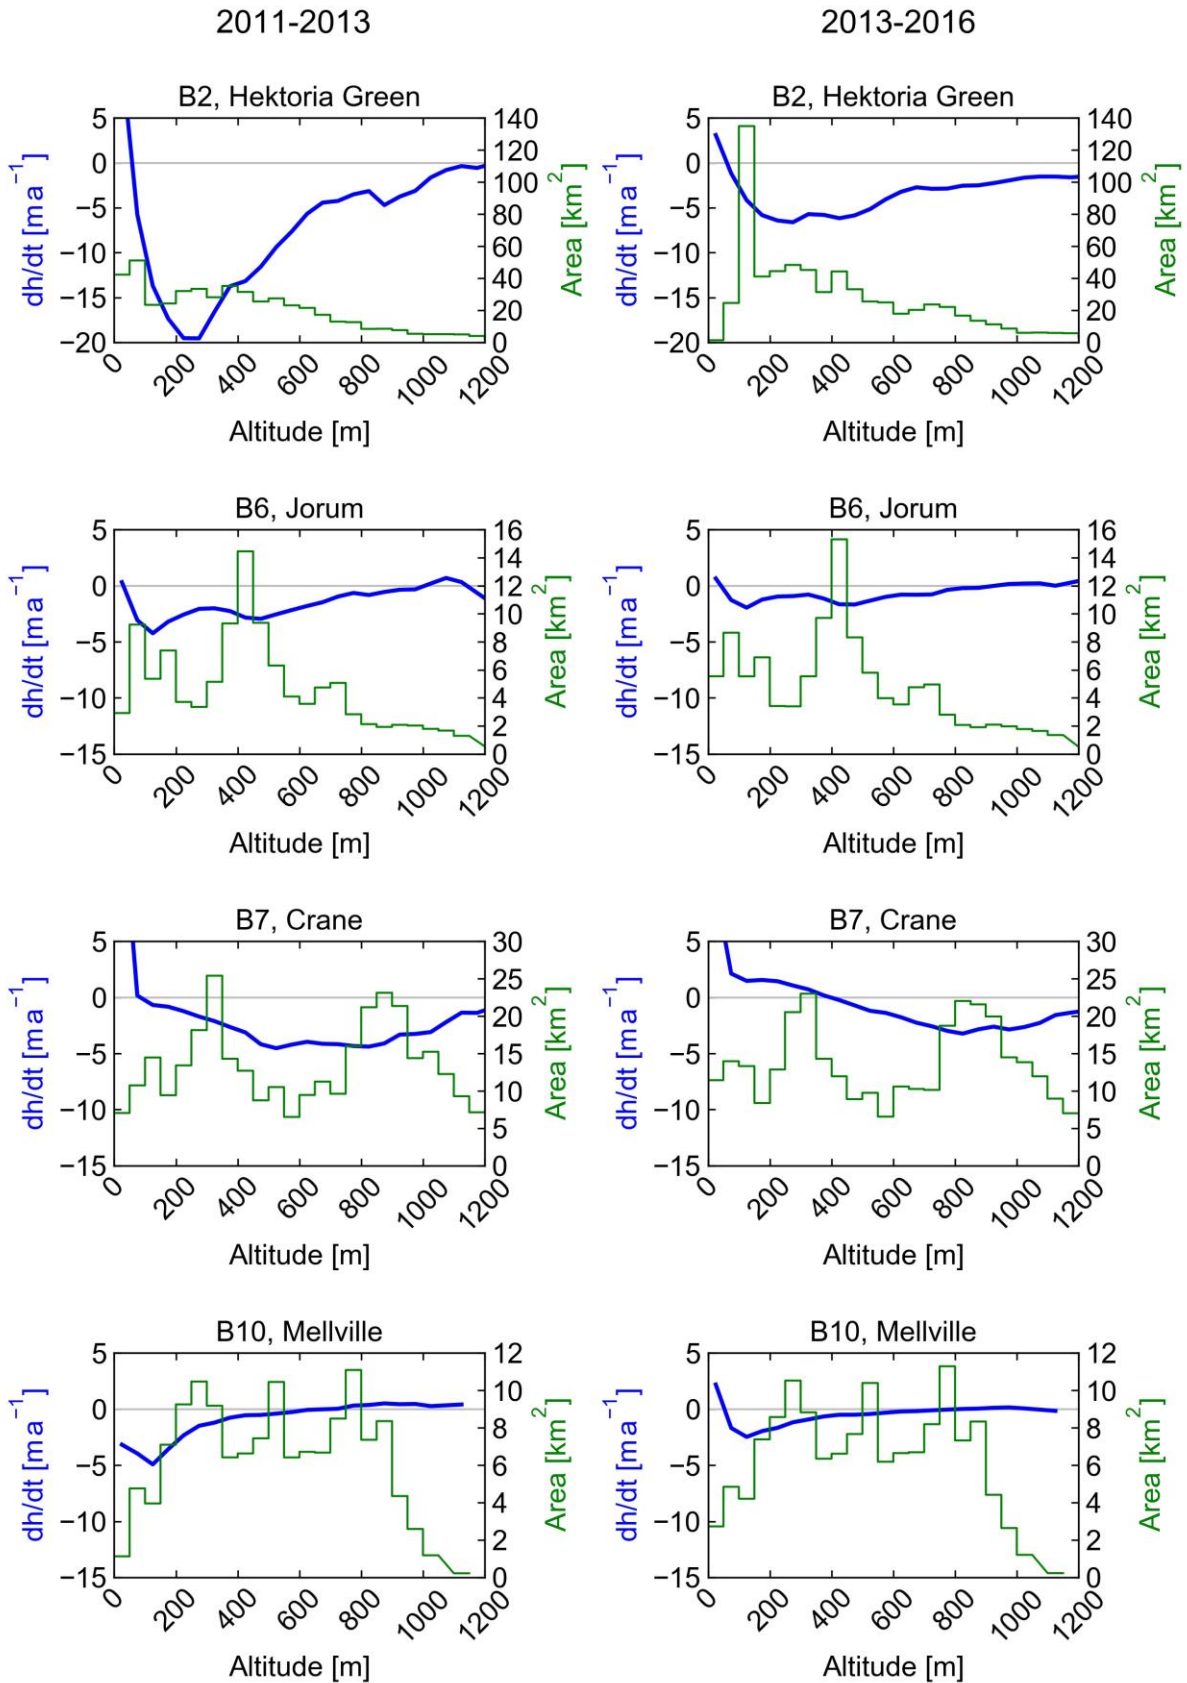

879

880 **Figure 78.** Rate of glacier surface elevation change  $dh/dt$  (in  $m a^{-1}$ ) 2011 to 2013 and ~~2103~~2013 to  
 881 2016 versus altitude in 50 m intervals for basins B2. B6. B7 and B10. Green line: hypsometry of  
 882 surveyed glacier area in  $km^2$ .



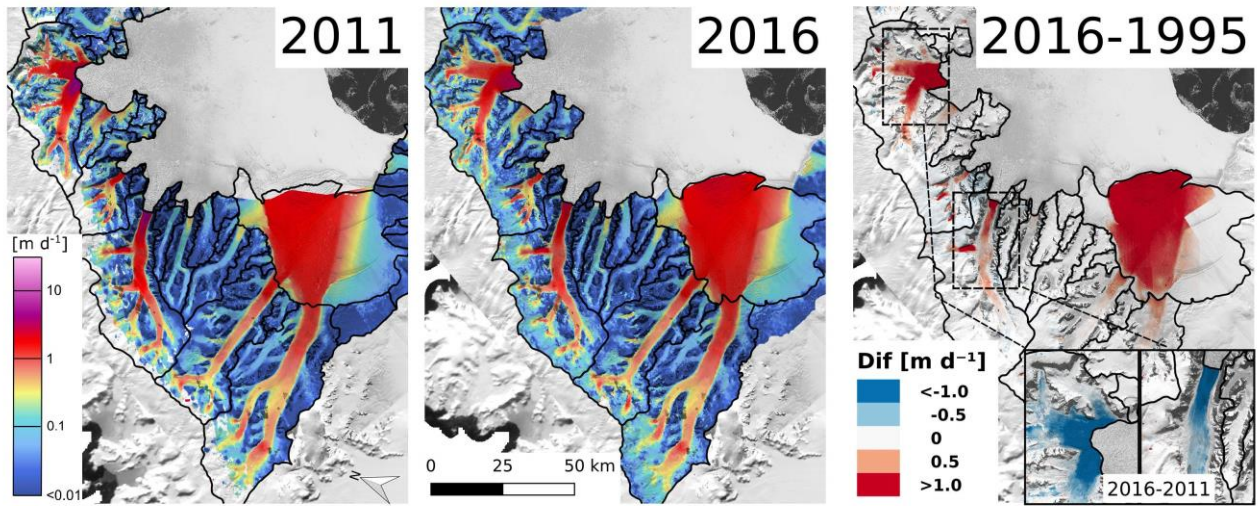

883

884 **Figure 89.** Magnitude of ice velocity [ $\text{m d}^{-1}$ ] 2011 and 2016 derived from TerraSAR-X and  
 885 TanDEM-X data. Gaps in 2011 filled with PALSAR data and in 2016 filled with Sentinel-1 data.  
 886 Right: Map of velocity difference 2016 minus 1995. Insets: velocity difference 2016 minus 2011 for  
 887 HG and Crane glaciers.

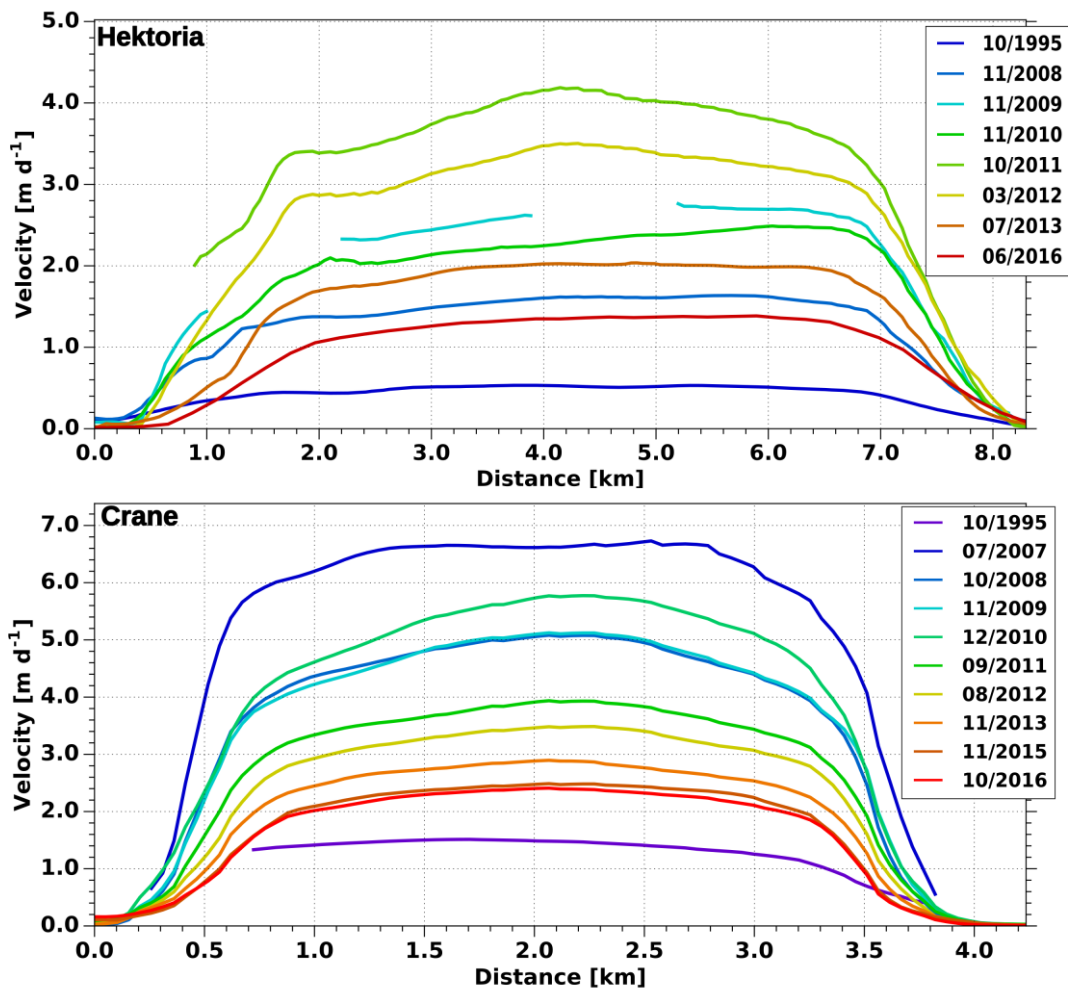

888

889 **Figure 910.** Surface velocity across the flux gate of Hektor Glacier and Crane Glacier on different



890 dates (month/year) between 1995 and 2016.
